# Supplementary material for: Ruthenium-catalyzed cyclization of N-carbamoyl indolines with alkynes: an efficient route to pyrroloquinolinones
Source: Royal Society of Chemistry journal article supplement (doi:10.1039/c5ob01146a), 2015-01-01

**Ruthenium-Catalyzed Cyclization of *N*-Carbamoyl Indolines with Alkynes: An Efficient Route to Pyrroloquinolinones**

Ramasamy Manoharan and Masilamani Jeganmohan\*

Department of Chemistry, Indian Institute of Science Education and Research, Pune 411021,  
India

**Electronic Supplementary Information (ESI)**

**Table of Contents**

|               |                                                                           |
|---------------|---------------------------------------------------------------------------|
| Pages 2       | Experimental Section                                                      |
| Pages 3 – 5   | Optimization studies                                                      |
| Pages 6 – 9   | Crystal structure of Compounds                                            |
| Pages 10 – 34 | Copies of <sup>1</sup> H and <sup>13</sup> C NMR Spectra of all Compounds |

## Experimental section

### General Procedure for the Preparation of Pyrroloquinolinones Catalyzed by Ruthenium Complex.

A 15-mL pressure tube with septum containing [ $\{\text{RuCl}_2(p\text{-cymene})\}_2$ ] (5.0 mol %), *N*-carbamoyl indolines **1** (100 mg), Adm-1-COOH (30 mol %), alkyne **2** (1.2 equiv) (if alkyne is solid) and  $\text{AgSbF}_6$  (20 mol %) was evacuated and purged with nitrogen gas three times ( $\text{AgSbF}_6$  was taken inside the glove box). To the tube were then added *tert*-amyl alcohol (3 ml) via syringe after that the reaction mixture was evacuated and purged with nitrogen gas three times (liquid alkynes were added at this stage via syringe). After that, the septum was taken out and immediately a screw cap was used to cover the tube under the nitrogen atmosphere and the reaction mixture stirred at room temperature for 5 minutes. Then, the reaction mixture was allowed to stir at 130 °C for 24 h. After cooling to ambient temperature, the reaction mixture was diluted with  $\text{CH}_2\text{Cl}_2$ , filtered through Celite and the filtrate was concentrated. The crude residue was purified through a silica gel column using hexanes and ethyl acetate as eluent to give pure product **3**.

### General Procedure for the Aromatization of Pyrroloquinolinones.

A 15-mL pressure tube with septum containing pyrroloquinolinone **3aa** or **3ah** (50 mg) and 2,3-dichloro-5,6-dicyano-1,4-benzoquinone (5.0 equiv) was evacuated and purged with nitrogen gas three times. To the tube was then added 1,4-dioxane (2.0 mL) via syringe after that the reaction mixture was evacuated and purged with nitrogen gas three times. After that, the septum was taken out and immediately a screw cap was used to cover the tube under the nitrogen atmosphere and the reaction mixture was stirred at room temperature for 5 minutes. Then, the reaction mixture was allowed to stir at 100 °C for 12 h. After cooling to ambient temperature, the reaction mixture was diluted with  $\text{CH}_2\text{Cl}_2$ , and concentrated. The crude residue was purified through a silica gel column using hexanes and ethyl acetate as eluent to give pure aromatized product **4a** or **4b**.

### Solvent Optimization.

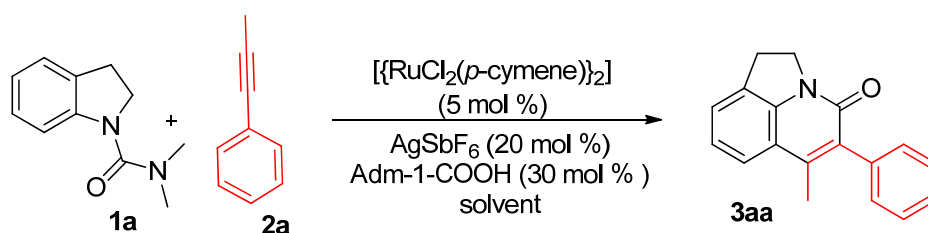

| S. No | Solvent                   | Base<br>(30 mol %) | Additive<br>(20 mol %) | Yield (%) <sup>b</sup> |
|-------|---------------------------|--------------------|------------------------|------------------------|
| 1     | DCE                       | Adm-1-COOH         | $AgSbF_6$              | 58                     |
| 2     | 1,4-dioxane               | Adm-1-COOH         | $AgSbF_6$              | 27                     |
| 3     | <i>iso</i> -PrOH          | Adm-1-COOH         | $AgSbF_6$              | 20                     |
| 4     | <i>tert</i> -amyl alcohol | Adm-1-COOH         | $AgSbF_6$              | 79                     |
| 5     | 1,2-dimethoxyethane       | Adm-1-COOH         | $AgSbF_6$              | 32                     |
| 6     | THF                       | Adm-1-COOH         | $AgSbF_6$              | 15                     |
| 7     | <i>t</i> -BuOH            | Adm-1-COOH         | $AgSbF_6$              | 17                     |
| 8     | Toluene                   | Adm-1-COOH         | $AgSbF_6$              | NR                     |
| 9     | Acetonitrile              | Adm-1-COOH         | $AgSbF_6$              | NR                     |
| 10    | DMSO                      | Adm-1-COOH         | $AgSbF_6$              | NR                     |
| 11    | DMF                       | Adm-1-COOH         | $AgSbF_6$              | NR                     |
| 12    | <i>tert</i> -amyl alcohol | Adm-1-COOH         | $AgSbF_6$              | 45 <sup>c</sup>        |

<sup>a</sup>All reactions were carried out using **1** (100 mg), alkynes **2a** (1.2 equiv),  $\{[RuCl_2(p\text{-cymene})]_2\}$  (5 mol %),  $AgSbF_6$  (20 mol %) and solvent (3.0 mL) at 130°C for 24 h. <sup>b</sup>GC yield. <sup>c</sup> at 110°C for 24 h

**Note:**

1. The catalytic reaction was tried without  $[\{\text{RuCl}_2(p\text{-cymene})\}_2]$ . No product **3aa** was observed.
2. The catalytic reaction was tried without  $\text{AgSbF}_6$ . No product **3aa** was observed.

**Base Optimization:**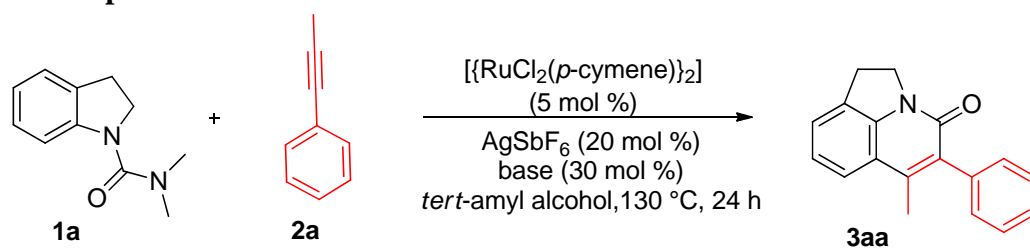

| S. No    | Solvent                         | Base ( 30 mol % )                                  | Additive<br>(20 mol % )            | Yield (%) <sup>a</sup>     |
|----------|---------------------------------|----------------------------------------------------|------------------------------------|----------------------------|
| 1        | <i>tert</i> -amyl alcohol       | NaOAc                                              | $\text{AgSbF}_6$                   | 25                         |
| 2        | <i>tert</i> -amyl alcohol       | LiOAc                                              | $\text{AgSbF}_6$                   | -                          |
| 3        | <i>tert</i> -amyl alcohol       | $\text{Cu}(\text{OAc})_2 \cdot \text{H}_2\text{O}$ | $\text{AgSbF}_6$                   | 37                         |
| 4        | <i>tert</i> -amyl alcohol       | $\text{Cu}(\text{OAc})_2 \cdot \text{H}_2\text{O}$ | $\text{AgSbF}_6$                   | 39 <sup>b</sup>            |
| 5        | <i>tert</i> -amyl alcohol       | AgOAc                                              | $\text{AgSbF}_6$                   | 29                         |
| 6        | <i>tert</i> -amyl alcohol       | $\text{Ag}_2\text{CO}_3$                           | $\text{AgSbF}_6$                   | 0                          |
| 7        | <i>tert</i> -amyl alcohol       | AcOH                                               | $\text{AgSbF}_6$                   | -                          |
| 8        | <i>tert</i> -amyl alcohol       | Mesitylinic acid                                   | $\text{AgSbF}_6$                   | 47                         |
| <b>9</b> | <b><i>tert</i>-amyl alcohol</b> | <b>Adm-1-COOH</b>                                  | <b><math>\text{AgSbF}_6</math></b> | <b>79 (73)<sup>c</sup></b> |
| 10       | <i>tert</i> -amyl alcohol       | $\text{CF}_3\text{COOH}$                           | $\text{AgSbF}_6$                   | -                          |
| 11       | <i>tert</i> -amyl alcohol       | PivOH                                              | $\text{AgSbF}_6$                   | 51                         |
| 12       | <i>tert</i> -amyl alcohol       | CsOPiv                                             | $\text{AgSbF}_6$                   | 0                          |
| 13       | <i>tert</i> -amyl alcohol       | CsOAc                                              | $\text{AgSbF}_6$                   | 0                          |
| 14       | <i>tert</i> -amyl alcohol       | Adm-1-COOH                                         | $\text{AgSbF}_6$                   | 81 <sup>d</sup>            |

<sup>a</sup>GC Yield. <sup>b</sup>Under air. <sup>c</sup>Yield in the paranthesis is isolated yield. <sup>d</sup>100 mol % of Adm-1-

COOH was used.

### Additive Optimization:

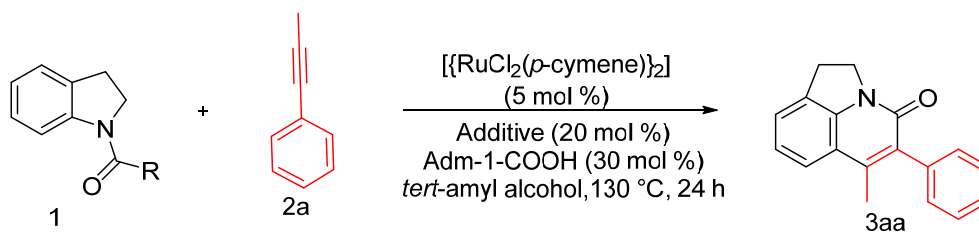

| Entry | Solvent                   | Base ( 30 mol % ) | Additive ( 20 mol % ) | Yield (%) <sup>a</sup> |
|-------|---------------------------|-------------------|-----------------------|------------------------|
| 1     | <i>tert</i> -amyl alcohol | Adm-1-COOH        | AgSbF <sub>6</sub>    | 79                     |
| 2     | <i>tert</i> -amyl alcohol | Adm-1-COOH        | AgBF <sub>4</sub>     | 41                     |
| 3     | <i>tert</i> -amyl alcohol | Adm-1-COOH        | AgOTf                 | 0                      |
| 4     | <i>tert</i> -amyl alcohol | Adm-1-COOH        | KPF <sub>6</sub>      | 0                      |

<sup>a</sup>GC Yield.

## Crystal structure of Compound 3aa.

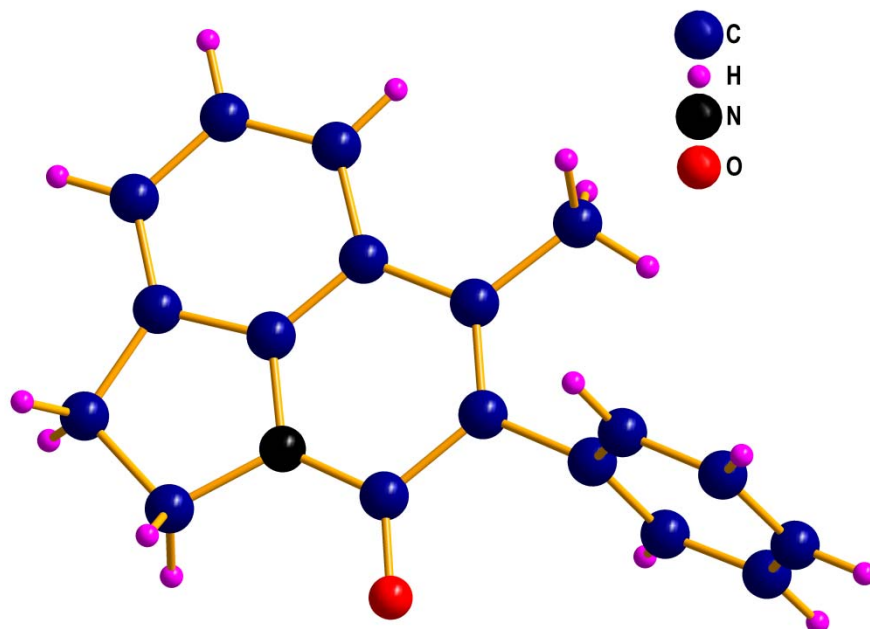

### Crystal data and structure refinement for 3aa.

|                                 |                            |                              |
|---------------------------------|----------------------------|------------------------------|
| Identification code             | NRM 323                    |                              |
| Empirical formula               | $C_{18}H_{15}NO$           |                              |
| Formula weight                  | 261.31                     |                              |
| Temperature                     | 100(2) K                   |                              |
| Wavelength                      | 1.54178 Å                  |                              |
| Crystal system                  | Monoclinic                 |                              |
| Space group                     | $P2_1/n$                   |                              |
| Unit cell dimensions            | $a = 7.6266(8)$ Å          | $\alpha = 90^\circ$ .        |
|                                 | $b = 18.5193(18)$ Å        | $\beta = 108.801(5)^\circ$ . |
|                                 | $c = 10.0793(10)$ Å        | $\gamma = 90^\circ$ .        |
| Volume                          | $1347.6(2)$ Å <sup>3</sup> |                              |
| Z                               | 4                          |                              |
| Density (calculated)            | 1.288 Mg/m <sup>3</sup>    |                              |
| Absorption coefficient          | 0.625 mm <sup>-1</sup>     |                              |
| F(000)                          | 594                        |                              |
| Crystal size                    | ?x ?x ? mm <sup>3</sup>    |                              |
| Theta range for data collection | 4.776 to 68.371°.          |                              |

|                                   |                                             |
|-----------------------------------|---------------------------------------------|
| Index ranges                      | -9<=h<=9, -22<=k<=22, -10<=l<=12            |
| Reflections collected             | 16428                                       |
| Independent reflections           | 2475 [R(int) = 0.0426]                      |
| Completeness to theta = 67.679°   | 100.0 %                                     |
| Refinement method                 | Full-matrix least-squares on F <sup>2</sup> |
| Data / restraints / parameters    | 2475 / 0 / 182                              |
| Goodness-of-fit on F <sup>2</sup> | 0.882                                       |
| Final R indices [I>2sigma(I)]     | R1 = 0.0405, wR2 = 0.1216                   |
| R indices (all data)              | R1 = 0.0540, wR2 = 0.1389                   |
| Extinction coefficient            | n/a                                         |
| Largest diff. peak and hole       | 0.190 and -0.115 e.Å <sup>-3</sup>          |

## Crystal structure of Compound 3af.

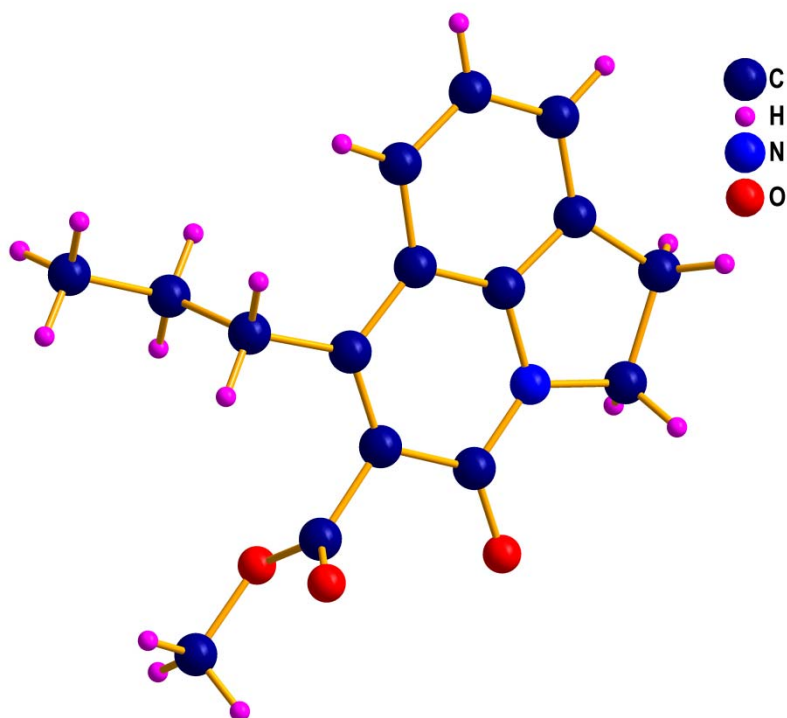

|                                 |                                                                |                               |
|---------------------------------|----------------------------------------------------------------|-------------------------------|
| Identification code             | NRM 22                                                         |                               |
| Empirical formula               | $C_{16}H_{17}NO_3$                                             |                               |
| Formula weight                  | 271.31                                                         |                               |
| Temperature                     | 100(2) K                                                       |                               |
| Wavelength                      | 1.54178 Å                                                      |                               |
| Crystal system                  | Triclinic                                                      |                               |
| Space group                     | P-1                                                            |                               |
| Unit cell dimensions            | $a = 8.1792(3)$ Å                                              | $\alpha = 91.062(2)^\circ$ .  |
|                                 | $b = 8.2361(3)$ Å                                              | $\beta = 95.422(2)^\circ$ .   |
|                                 | $c = 11.9209(4)$ Å                                             | $\gamma = 119.402(2)^\circ$ . |
| Volume                          | $694.53(4)$ Å <sup>3</sup>                                     |                               |
| Z                               | 2                                                              |                               |
| Density (calculated)            | 1.297 Mg/m <sup>3</sup>                                        |                               |
| Absorption coefficient          | 0.730 mm <sup>-1</sup>                                         |                               |
| F(000)                          | 308                                                            |                               |
| Crystal size                    | 0.230 x 0.100 x 0.050 mm <sup>3</sup>                          |                               |
| Theta range for data collection | 3.735 to 68.392°.                                              |                               |
| Index ranges                    | $-9 \leq h \leq 9$ , $-9 \leq k \leq 9$ , $-13 \leq l \leq 14$ |                               |
| Reflections collected           | 7560                                                           |                               |
| Independent reflections         | 2525 [R(int) = 0.0259]                                         |                               |



|                                   |                                             |
|-----------------------------------|---------------------------------------------|
| Completeness to theta = 67.679°   | 99.4 %                                      |
| Refinement method                 | Full-matrix least-squares on F <sup>2</sup> |
| Data / restraints / parameters    | 2525 / 0 / 183                              |
| Goodness-of-fit on F <sup>2</sup> | 0.639                                       |
| Final R indices [I>2sigma(I)]     | R1 = 0.0445, wR2 = 0.1168                   |
| R indices (all data)              | R1 = 0.0551, wR2 = 0.1311                   |
| Extinction coefficient            | n/a                                         |
| Largest diff. peak and hole       | 0.297 and -0.247 e.Å <sup>-3</sup>          |

## Spectral Data of Compounds

### $^1\text{H}$ and $^{13}\text{C}$ NMR Spectra of Compound 3aa.

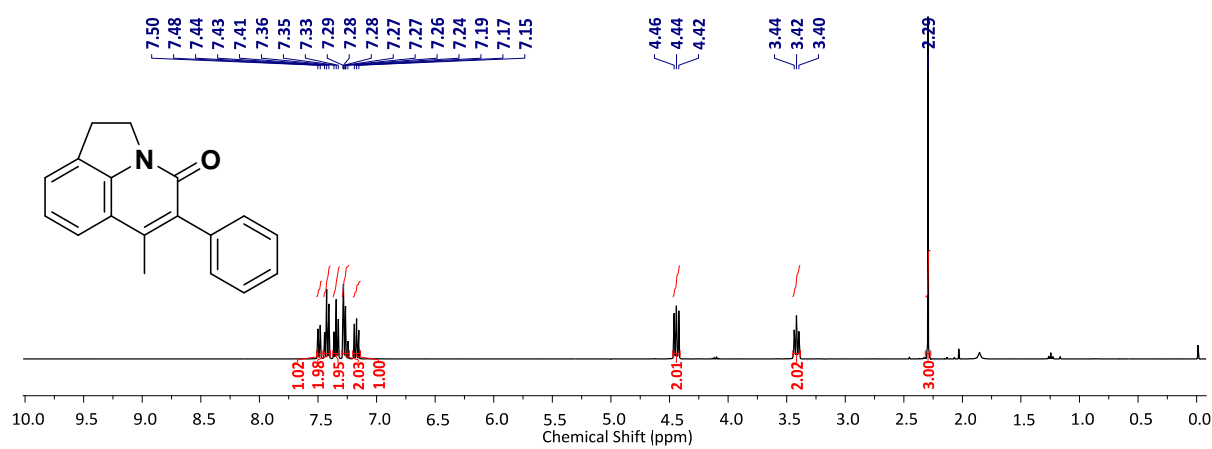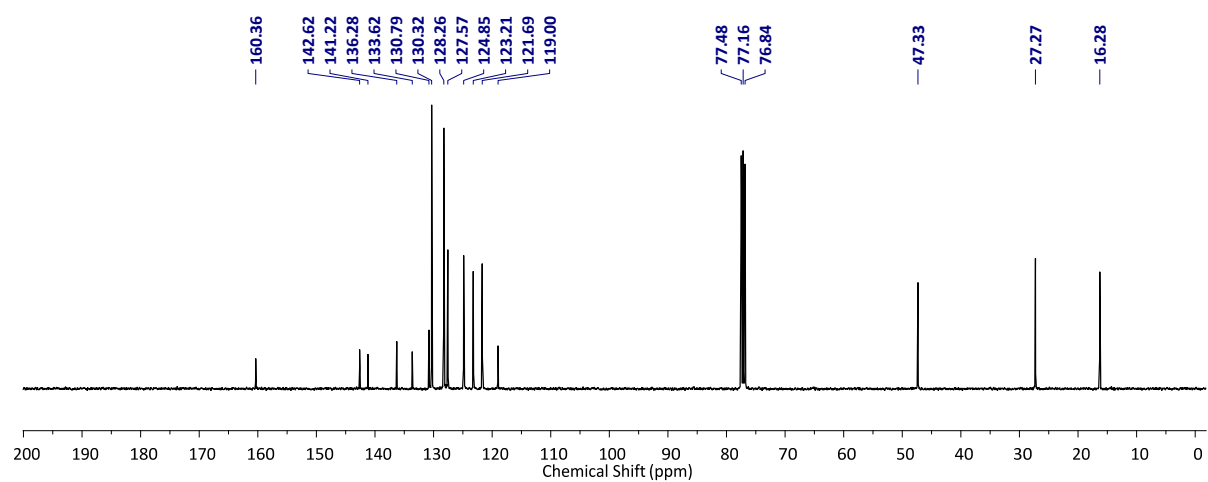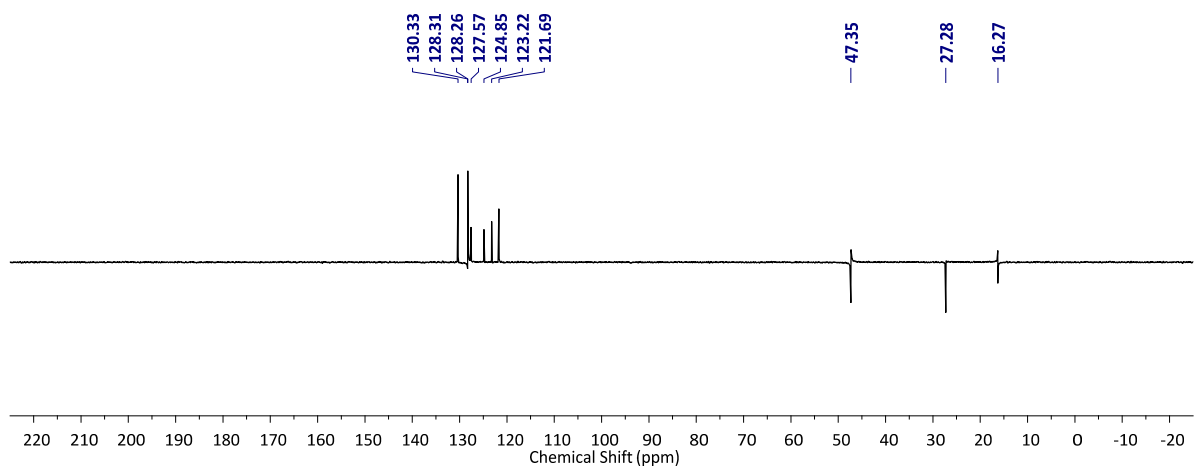

# $^1\text{H}$ and $^{13}\text{C}$ NMR Spectra of Compound 3ab.

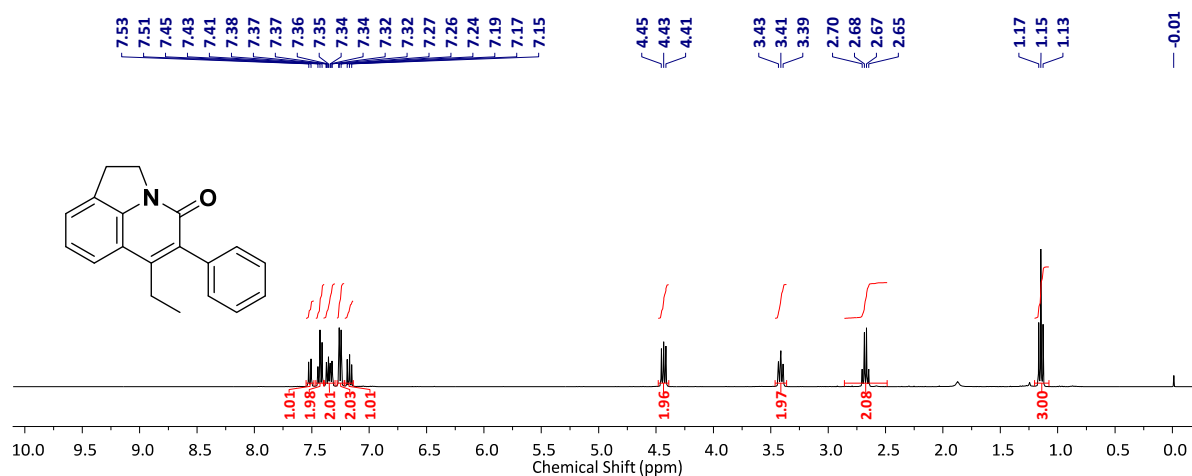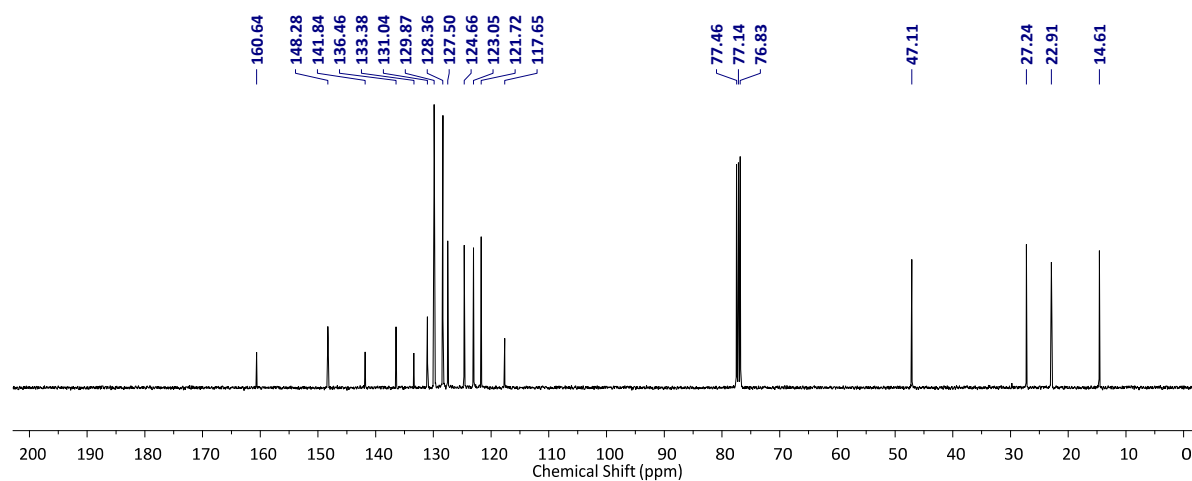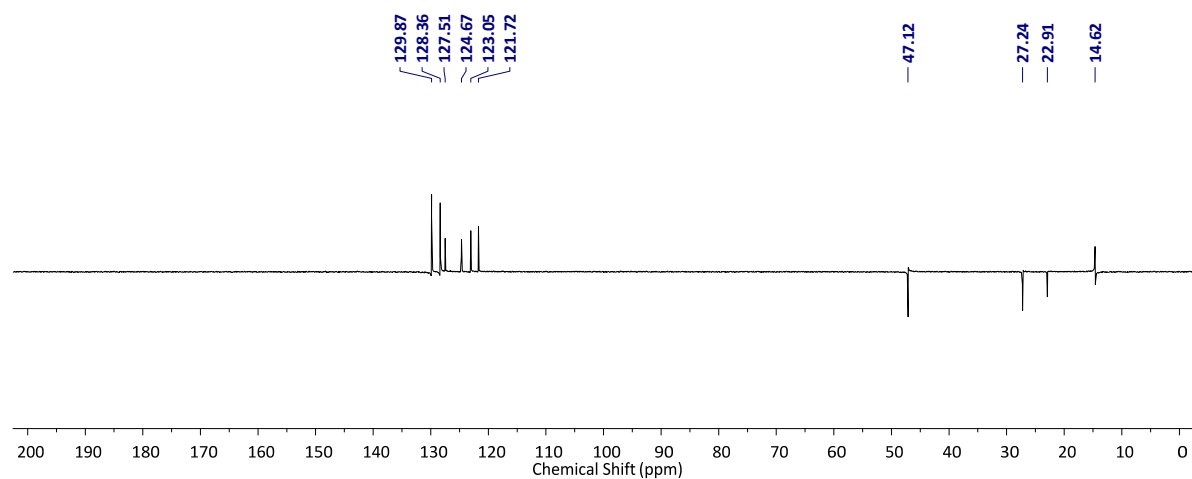

# <sup>1</sup>H and <sup>13</sup>C NMR Spectra of Compound 3ac.

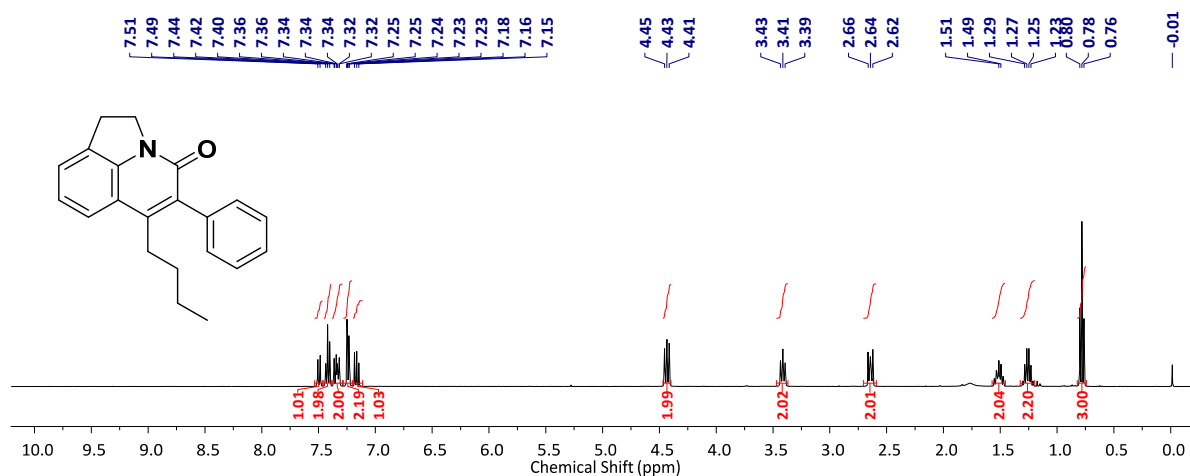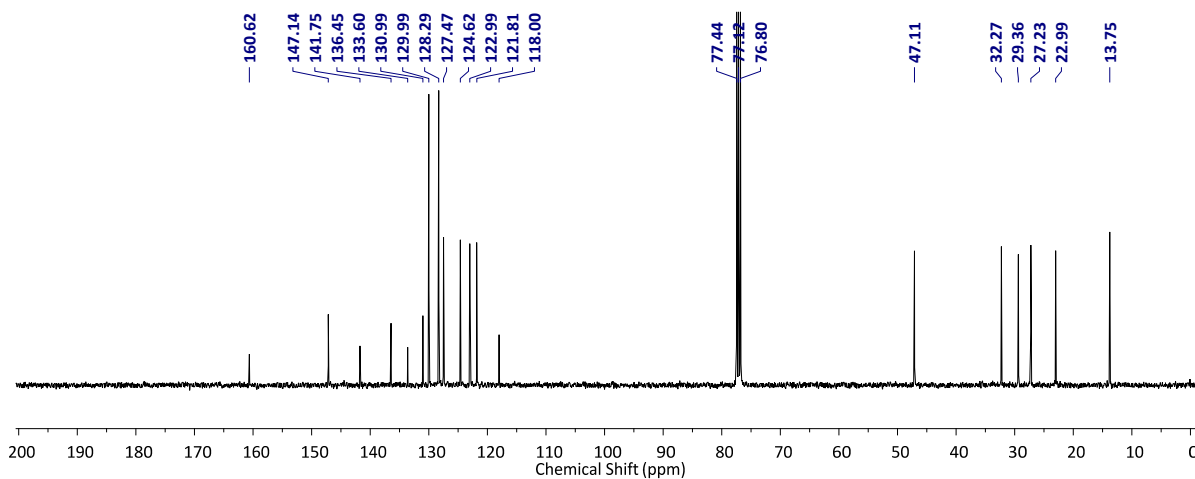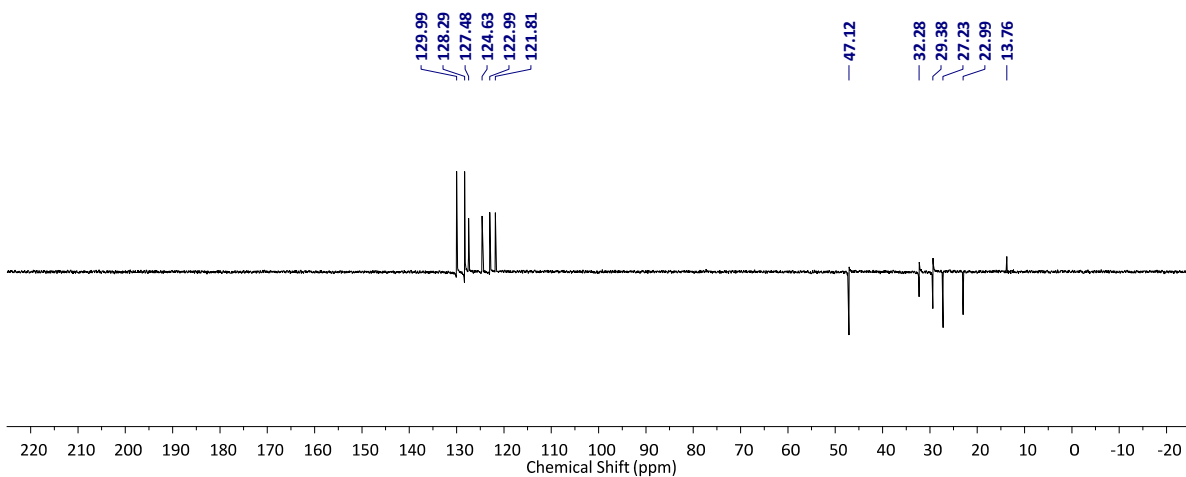

# <sup>1</sup>H and <sup>13</sup>C NMR Spectra of Compound 3ad.

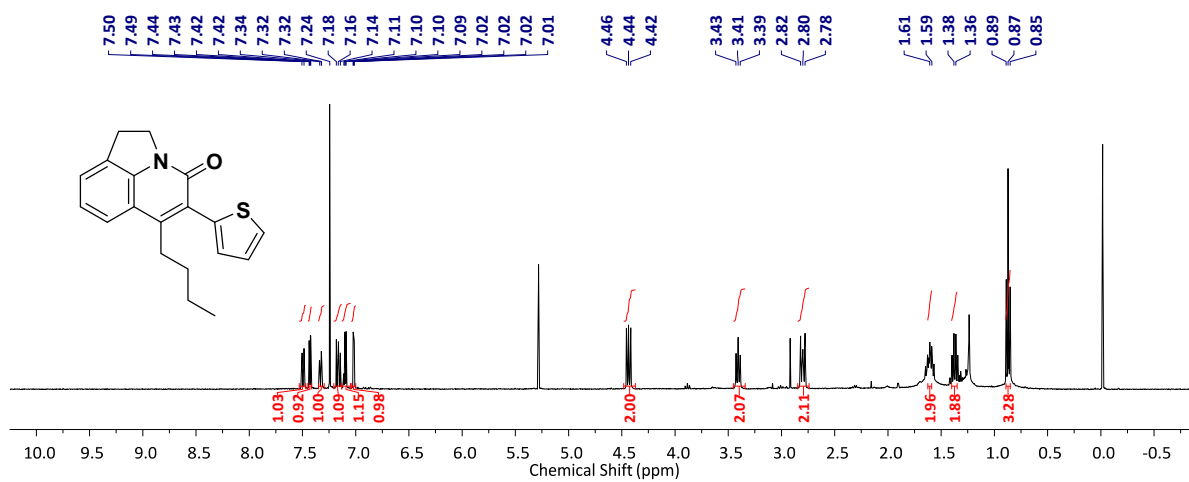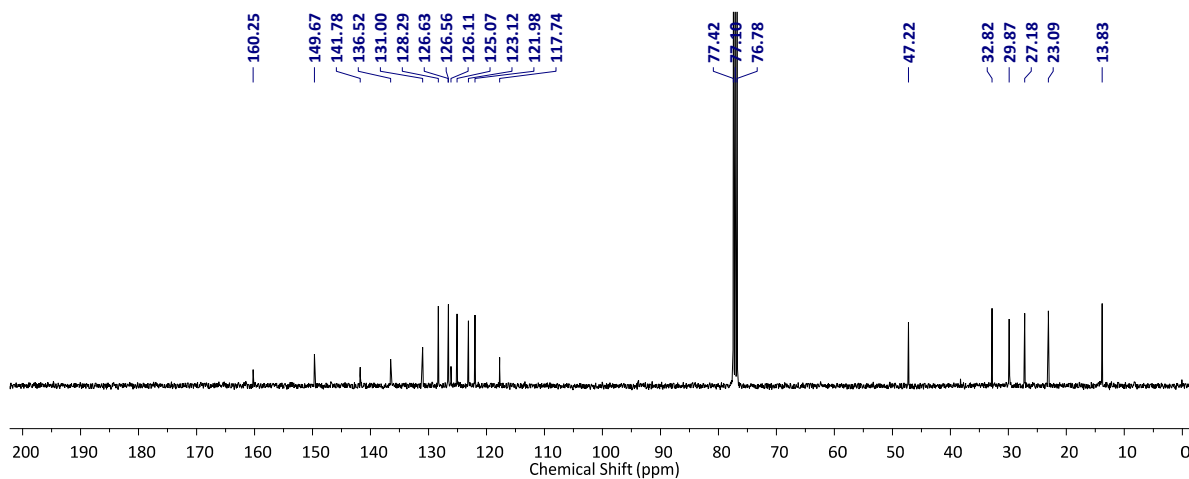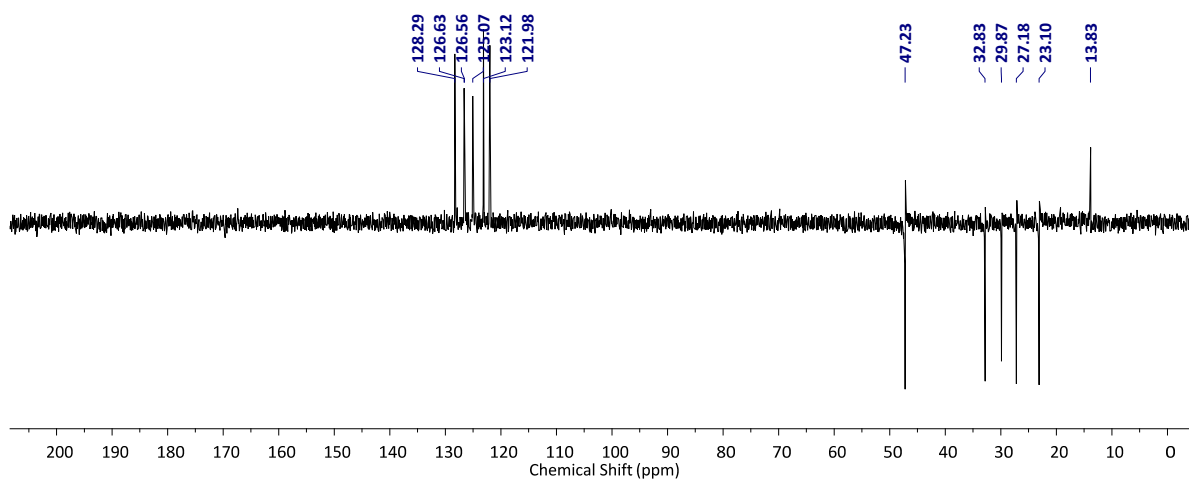

# <sup>1</sup>H and <sup>13</sup>C NMR Spectra of Compound 3ae.

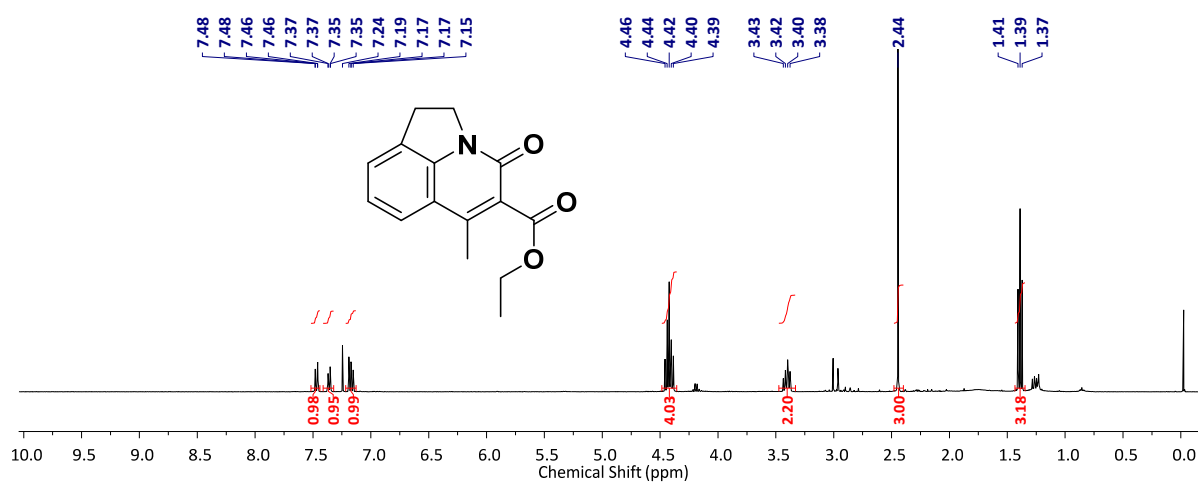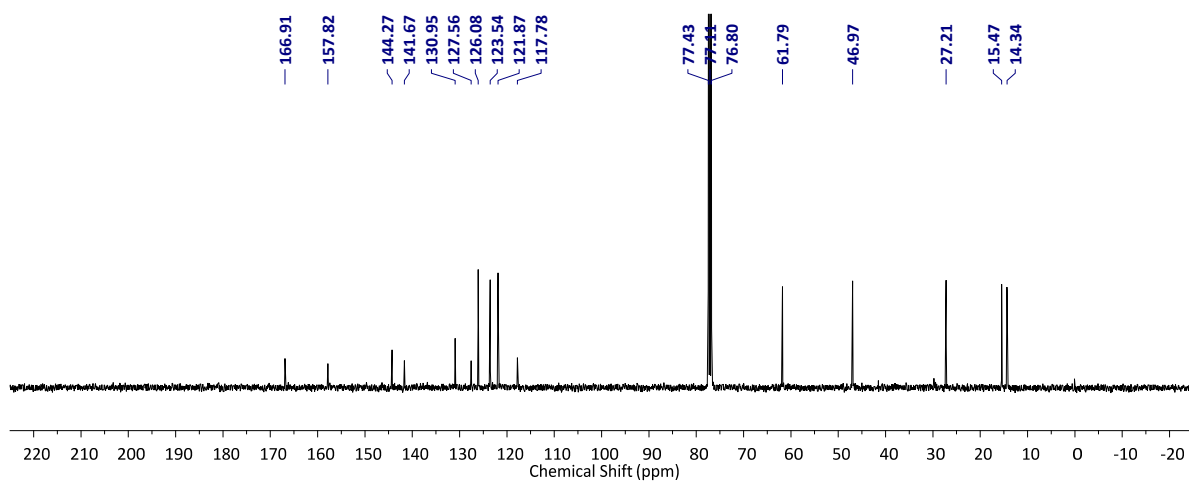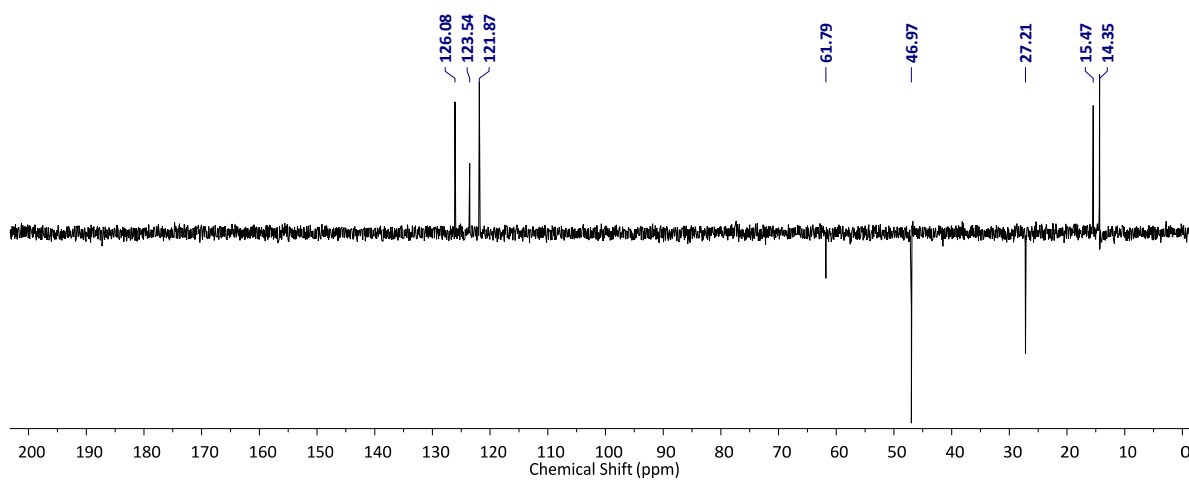

# $^1\text{H}$ and $^{13}\text{C}$ NMR Spectra of Compound 3af.

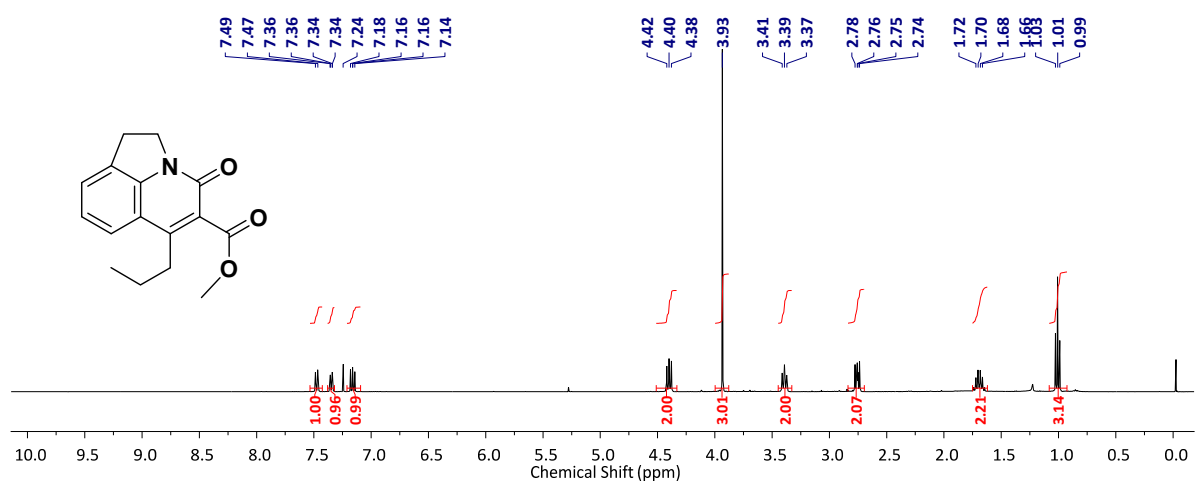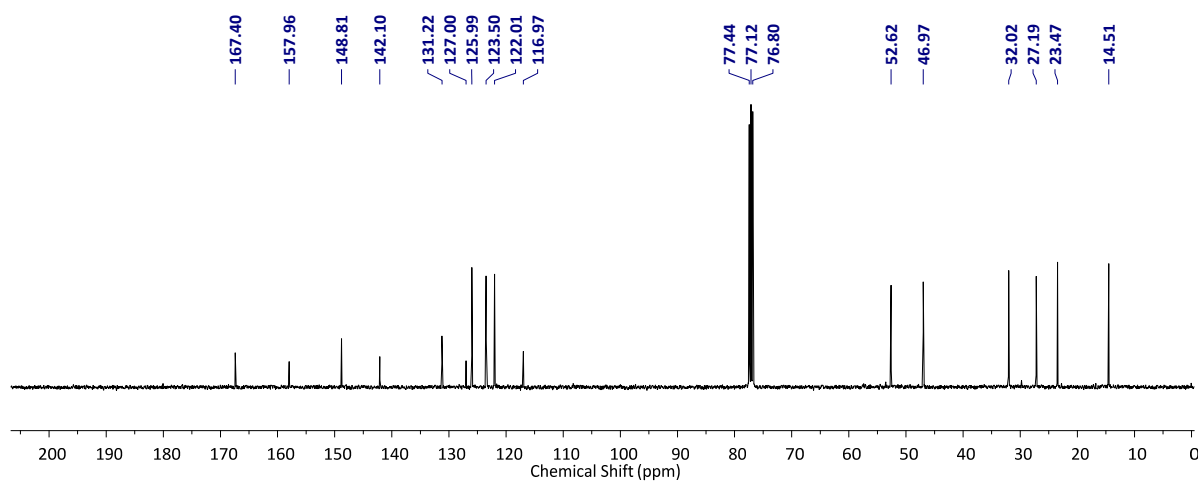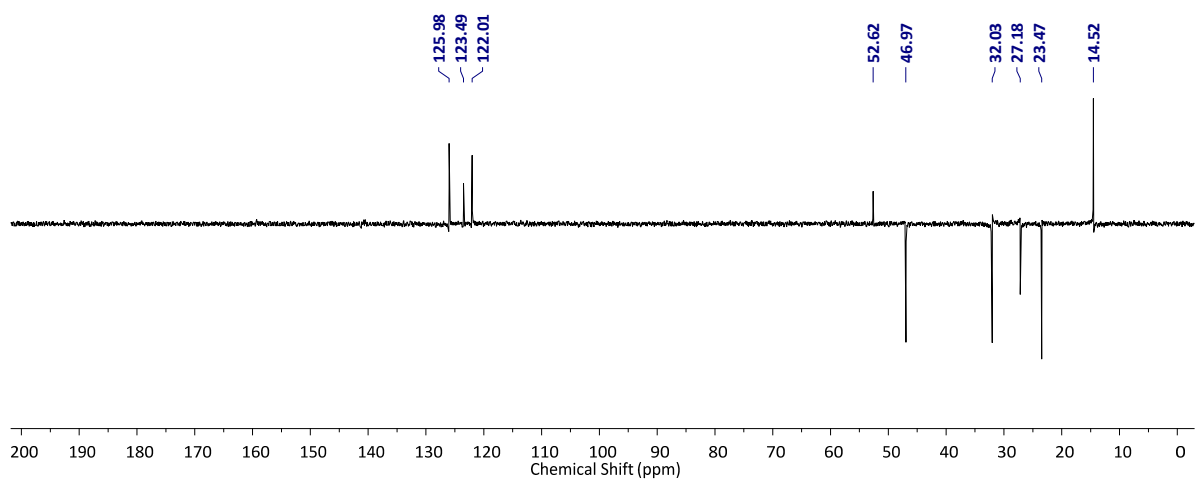

# $^1\text{H}$ and $^{13}\text{C}$ NMR Spectra of Compound 3ag.

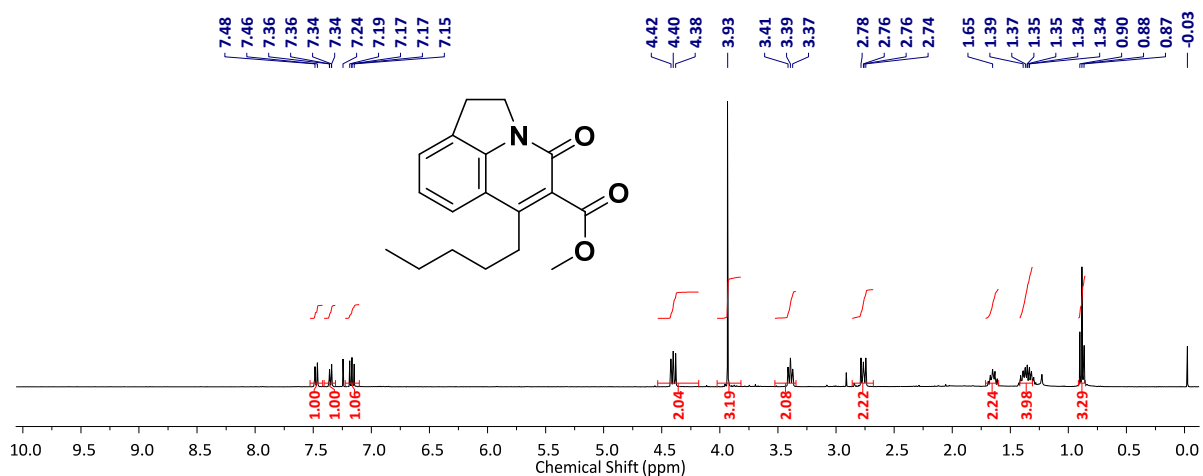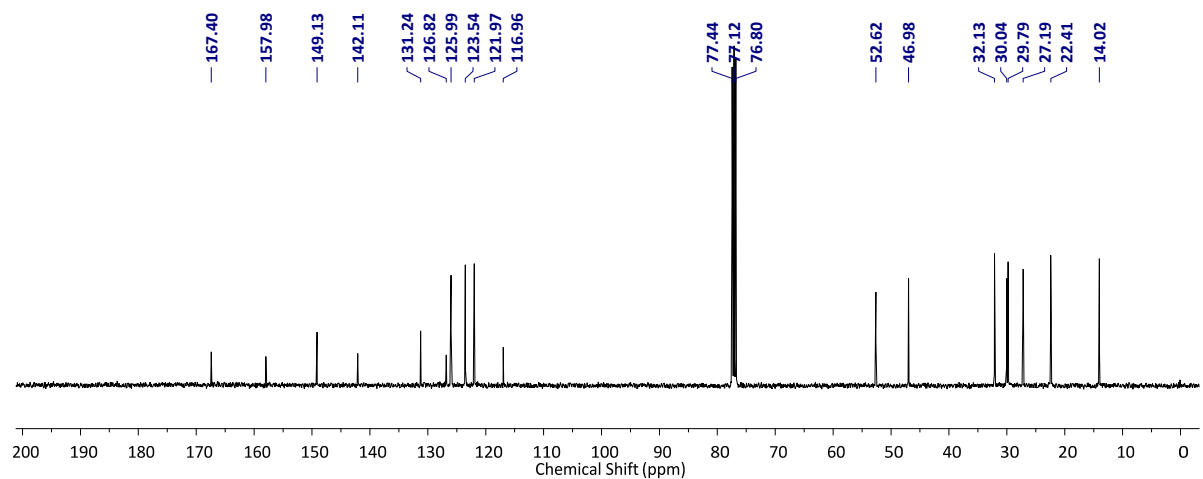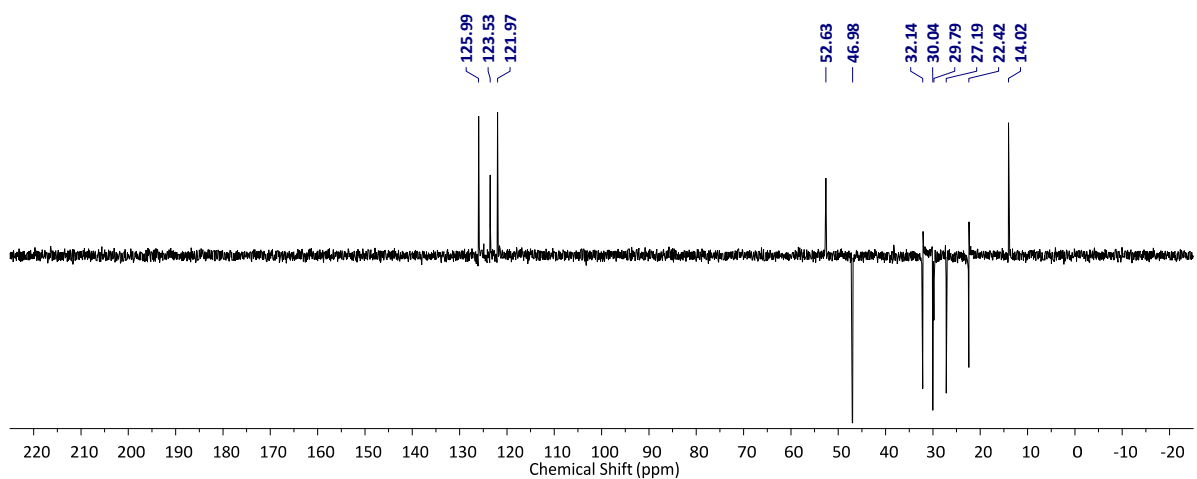



# <sup>1</sup>H and <sup>13</sup>C NMR Spectra of Compound 3ah.

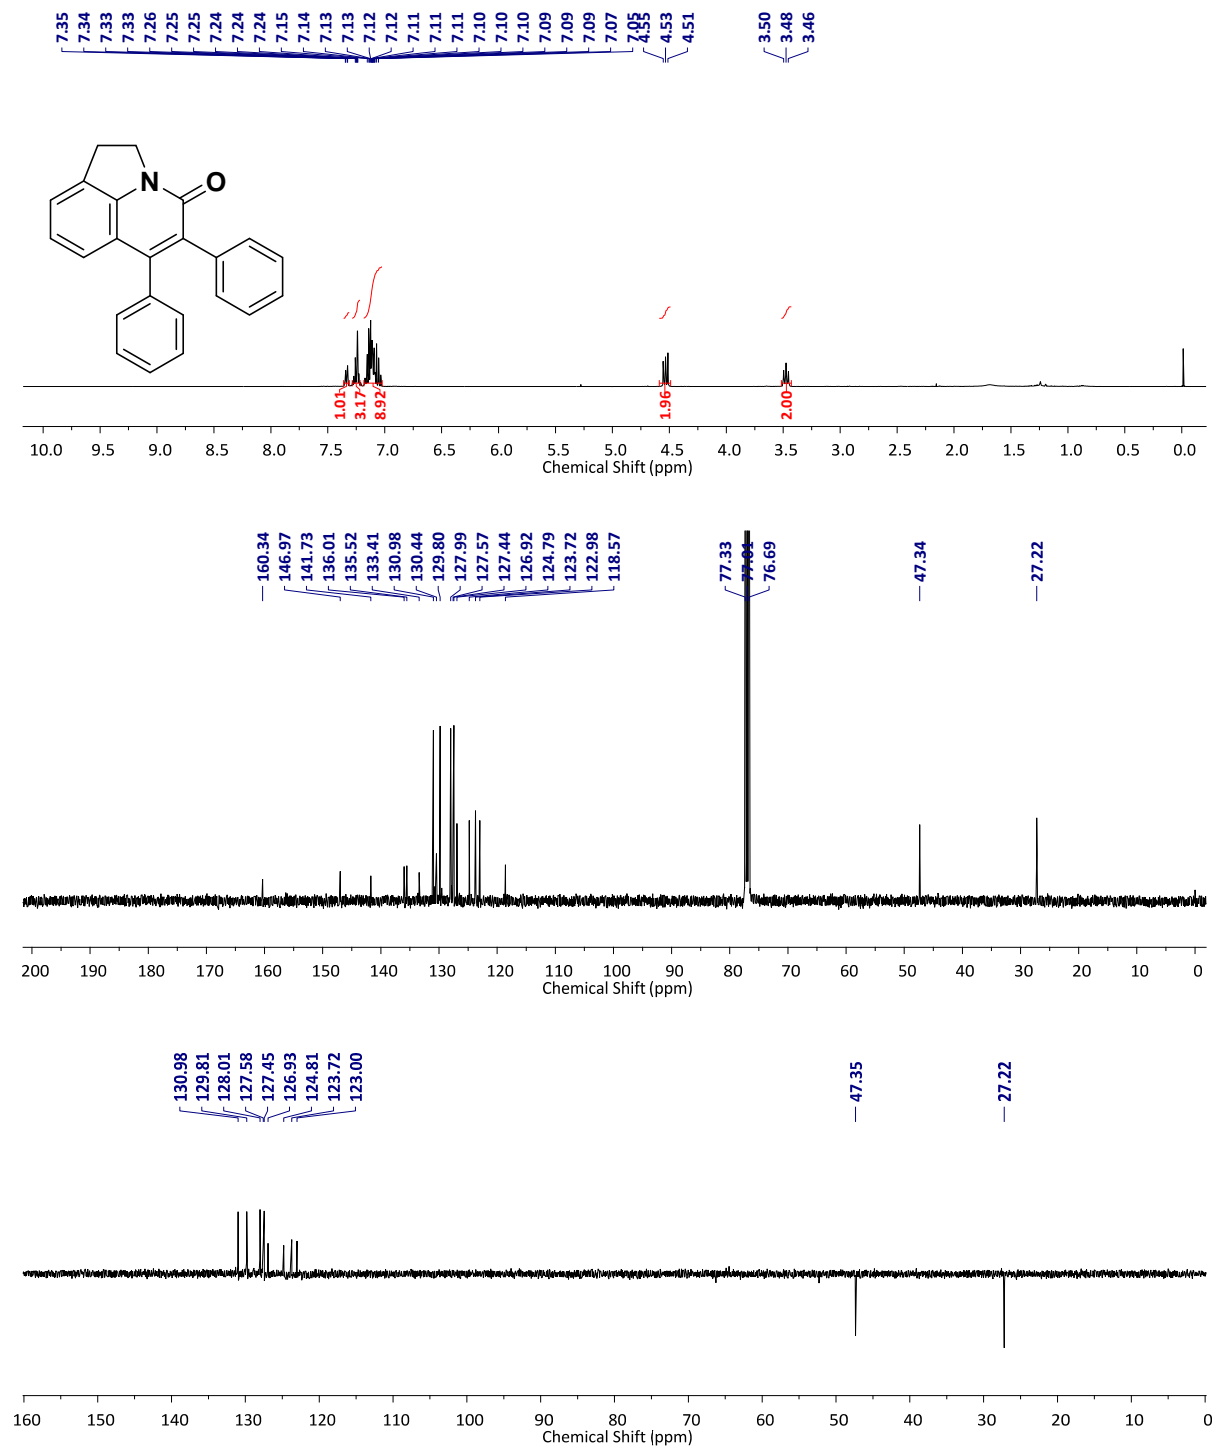

# <sup>1</sup>H and <sup>13</sup>C NMR Spectra of Compound 3ai.

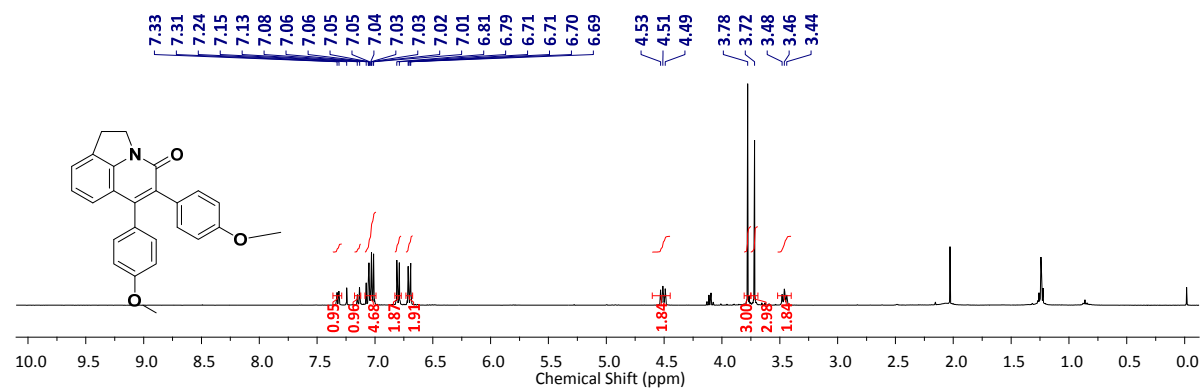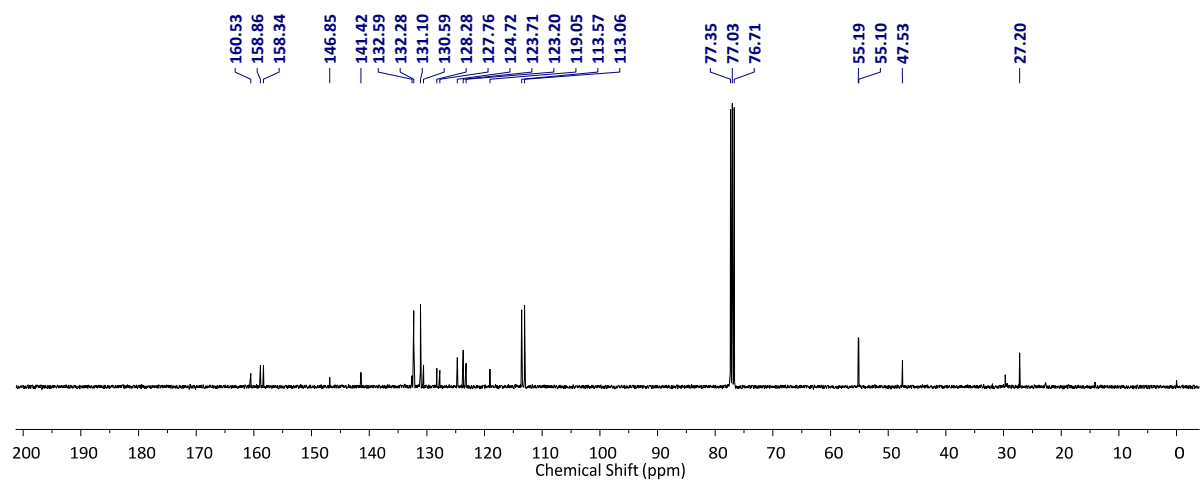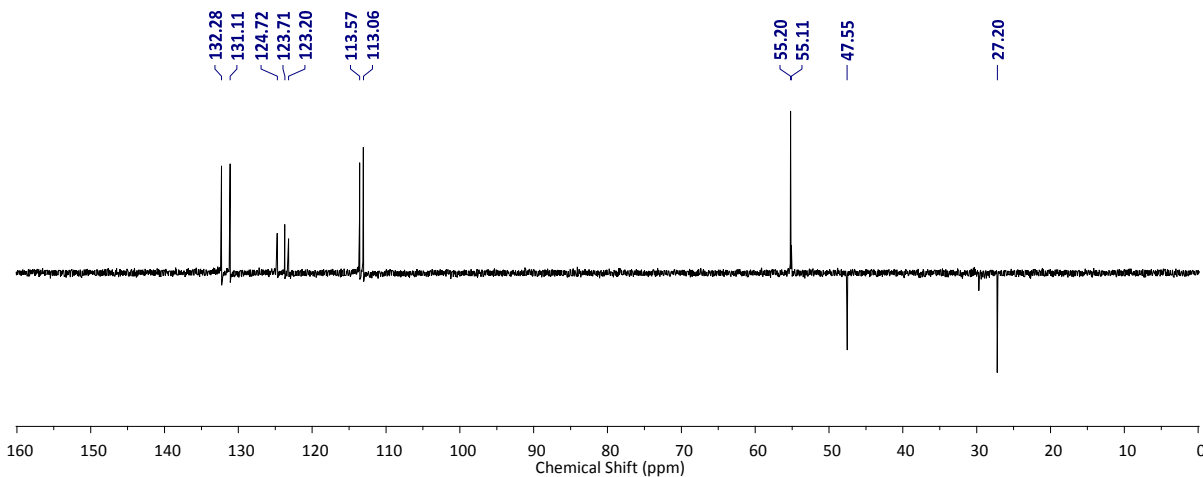

# $^1\text{H}$ and $^{13}\text{C}$ NMR Spectra of Compound 3aj.

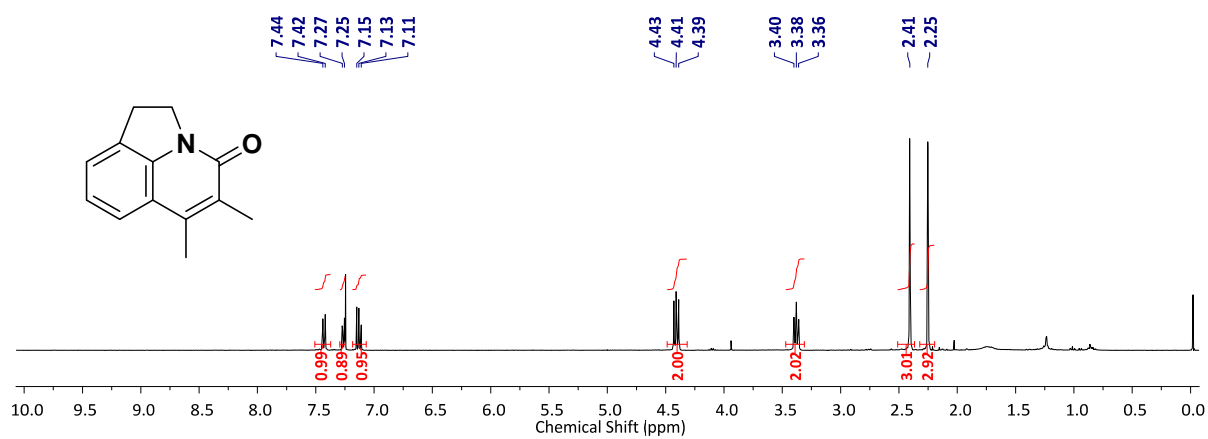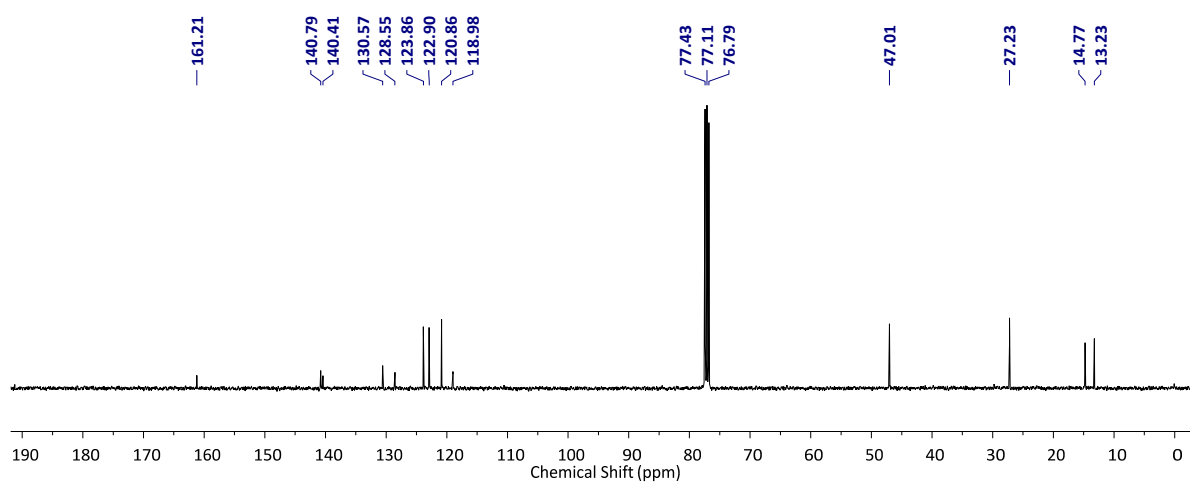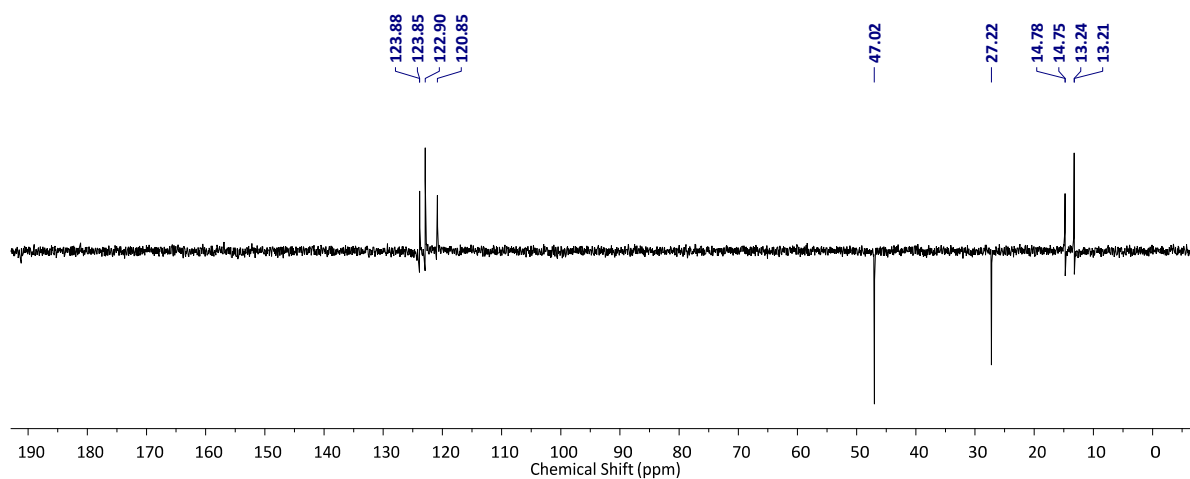

# <sup>1</sup>H and <sup>13</sup>C NMR Spectra of Compound 3ak.

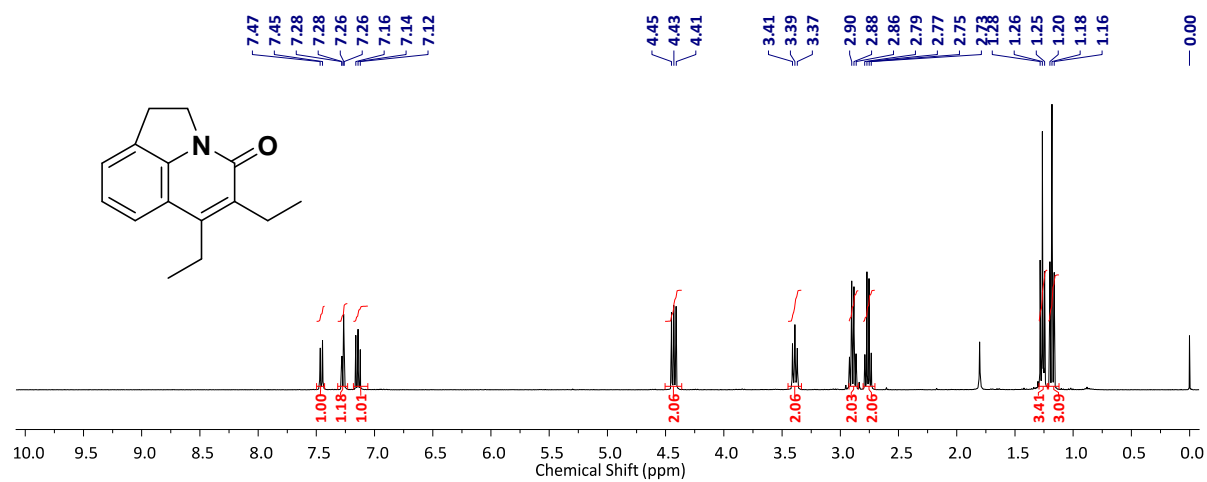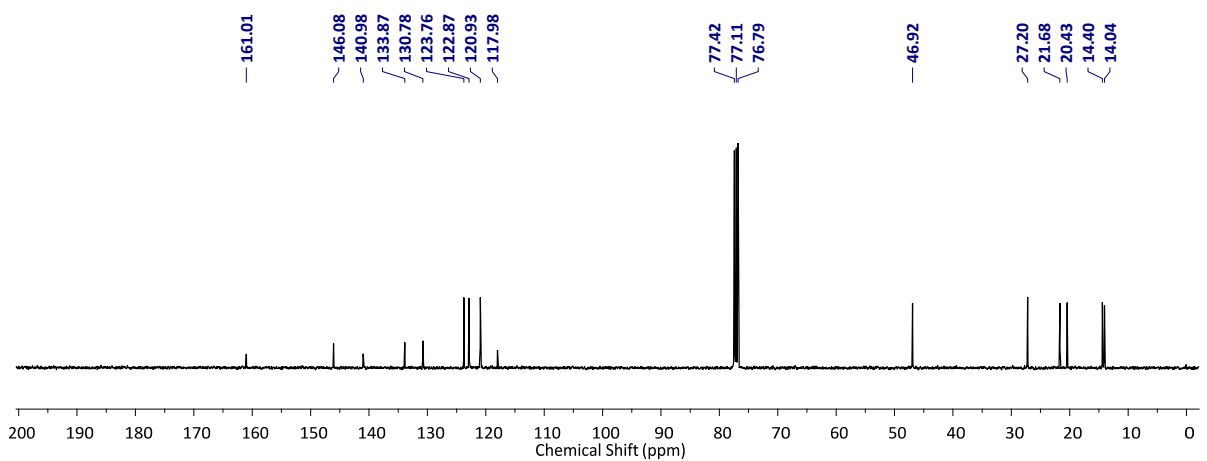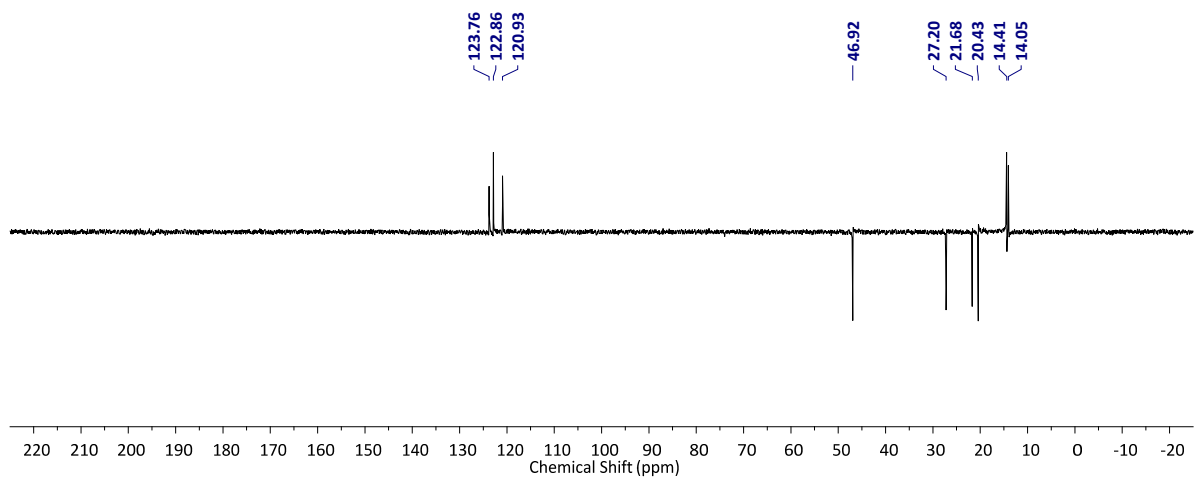

# <sup>1</sup>H and <sup>13</sup>C NMR Spectra of Compound 3a.

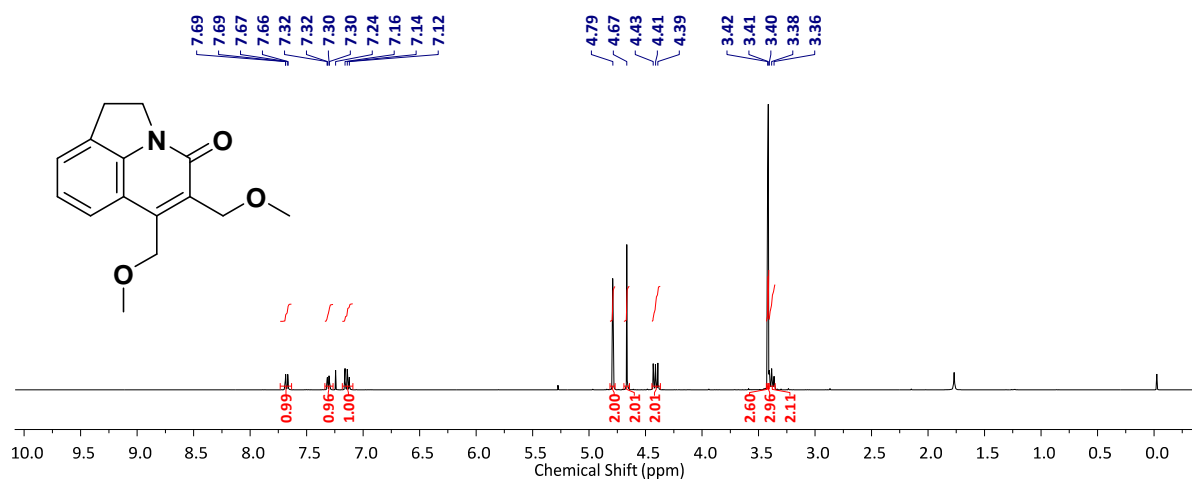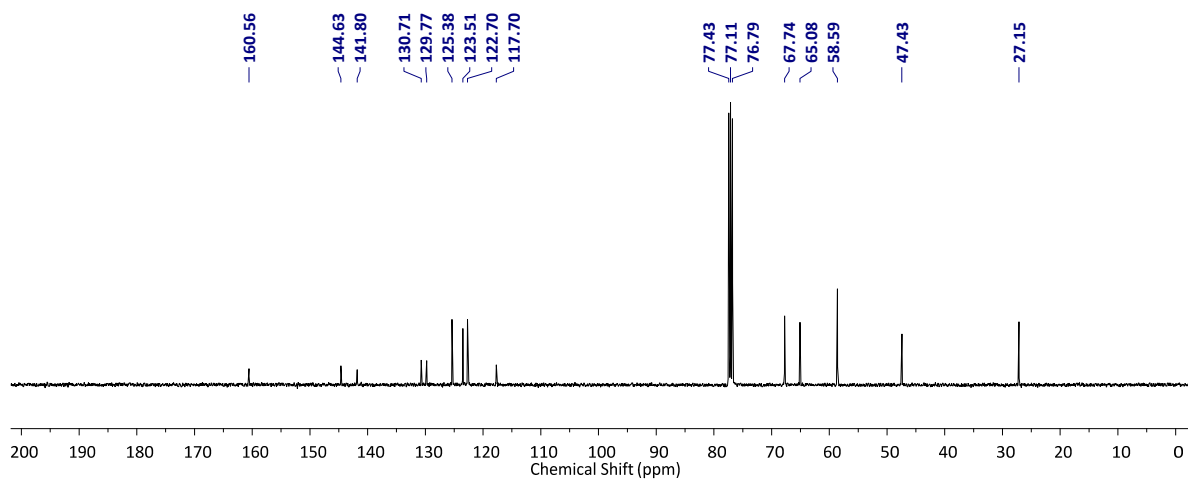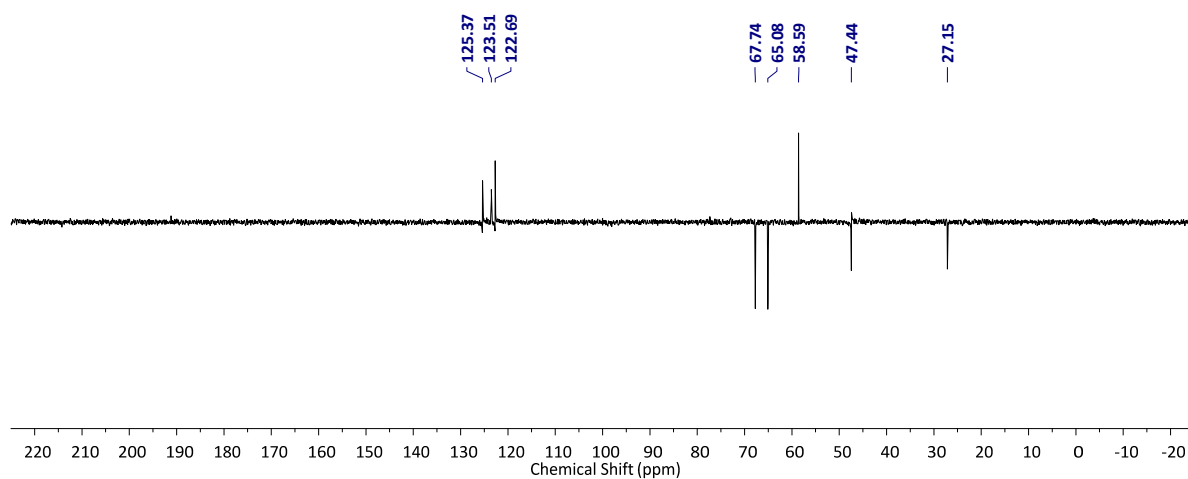

# $^1\text{H}$ and $^{13}\text{C}$ NMR Spectra of Compound 3ba.

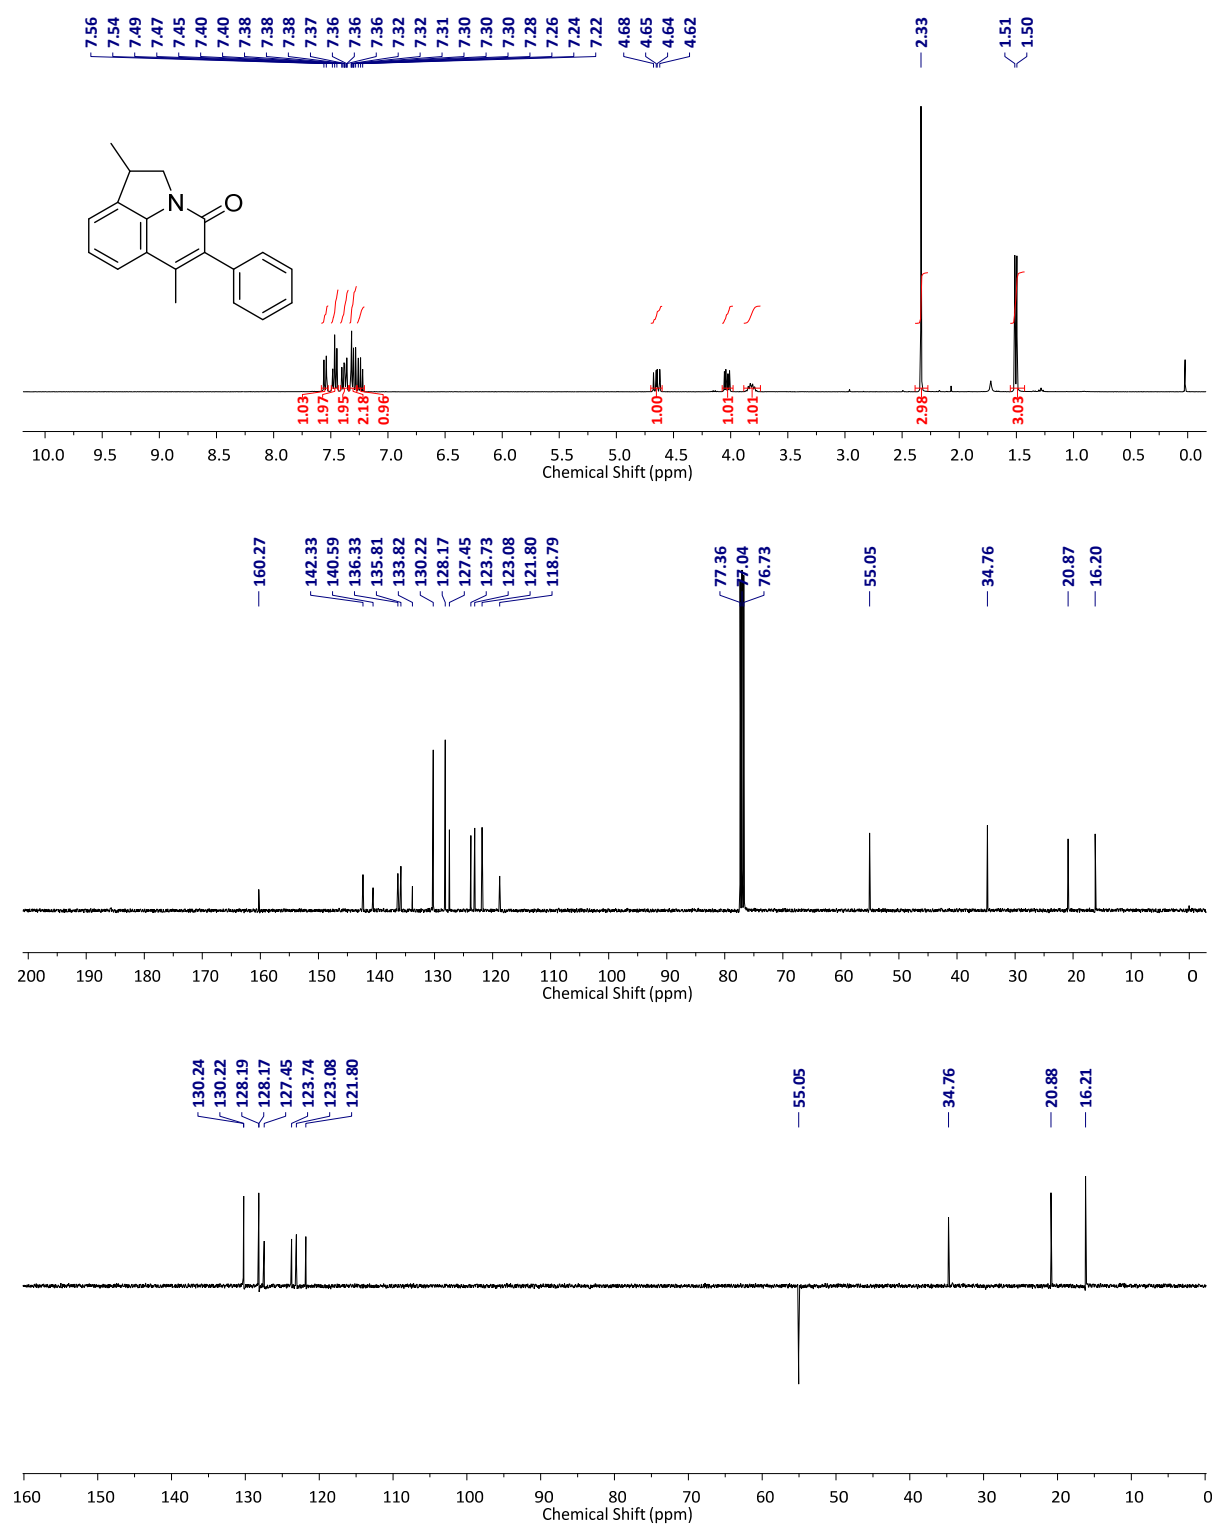

# <sup>1</sup>H and <sup>13</sup>C NMR Spectra of Compound 3bh.

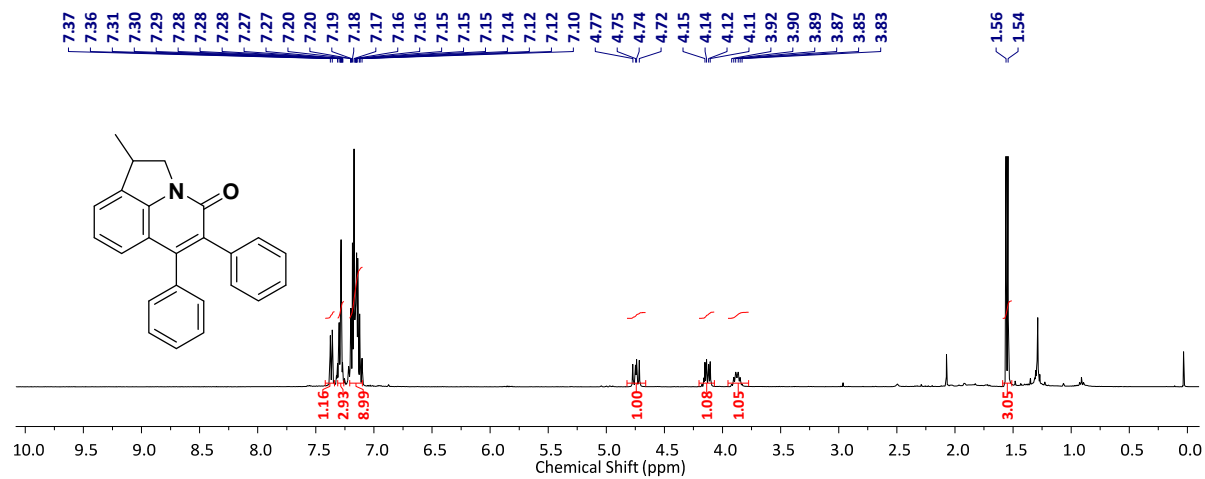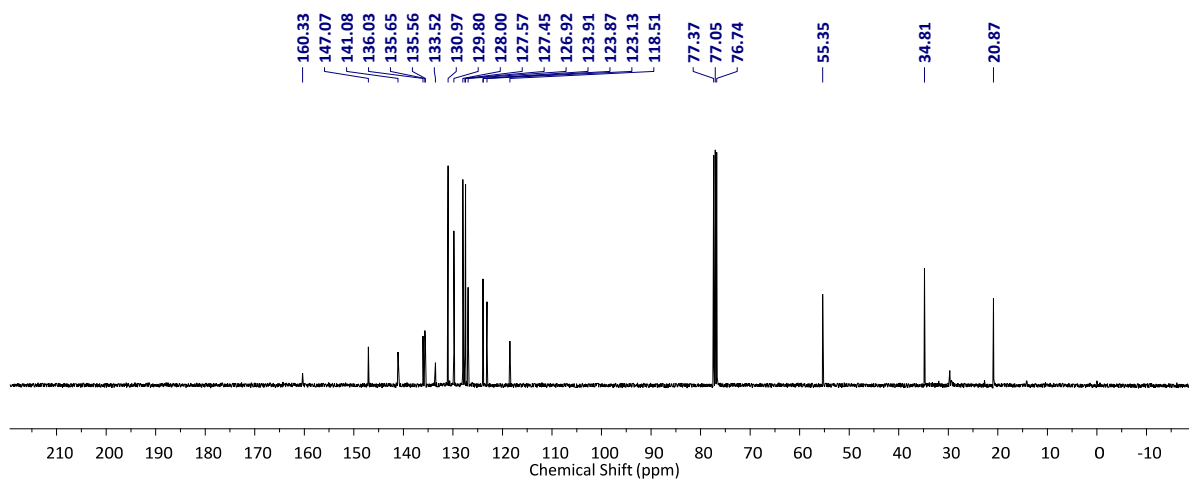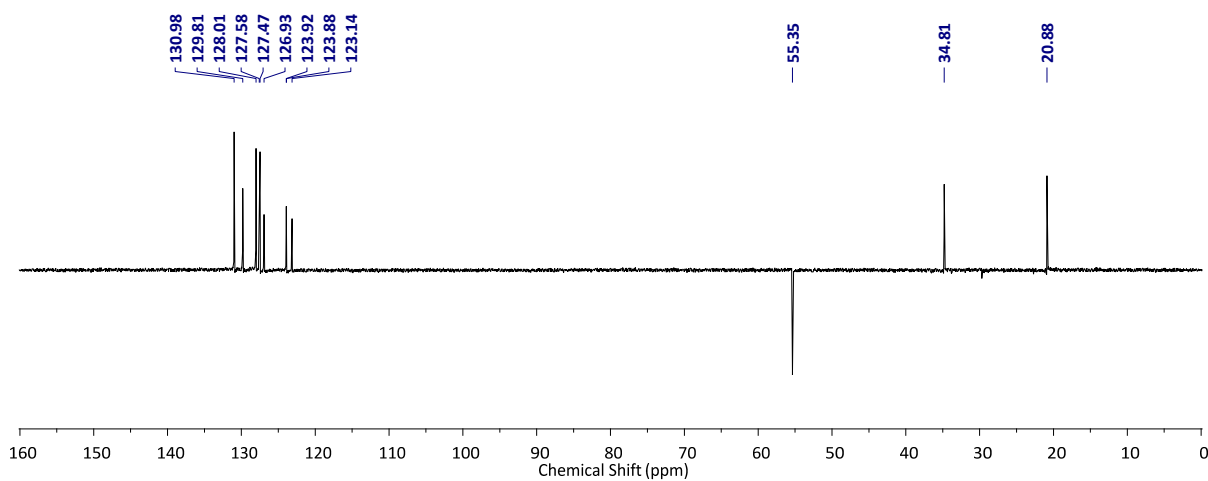

# <sup>1</sup>H and <sup>13</sup>C NMR Spectra of Compound 3ca.

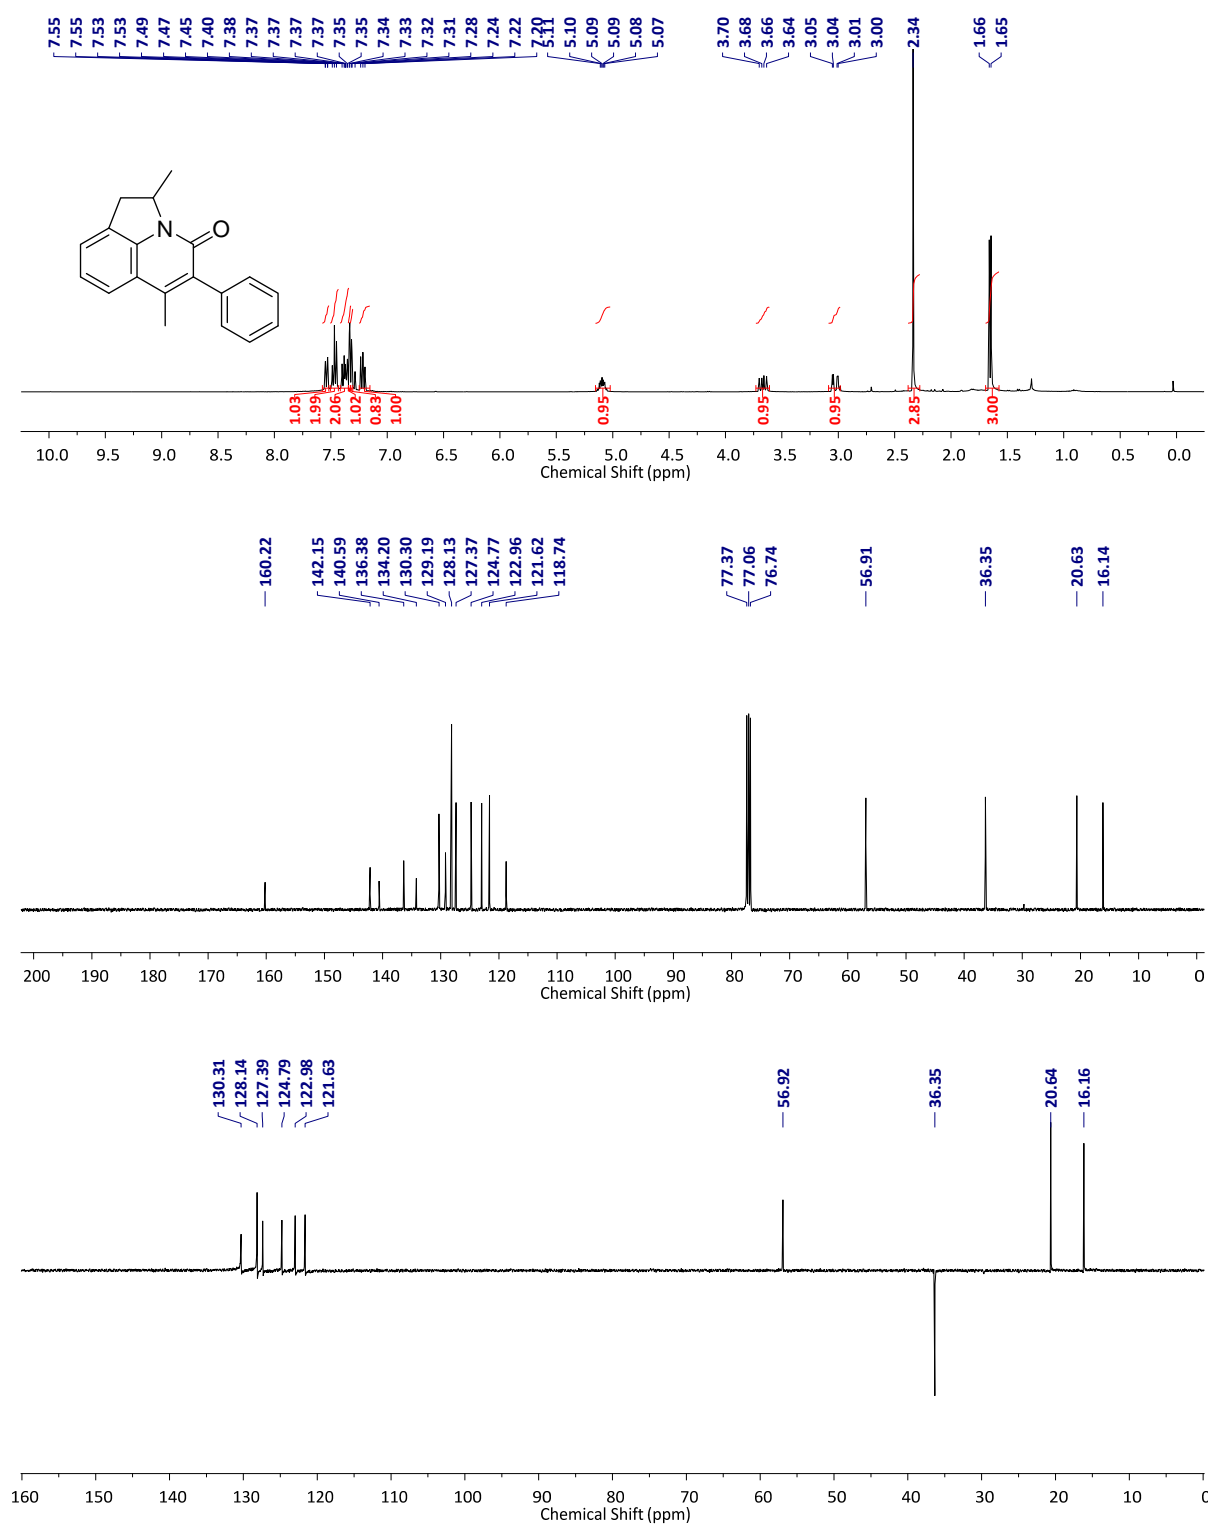



# $^1\text{H}$ and $^{13}\text{C}$ NMR Spectra of Compound 3ch.

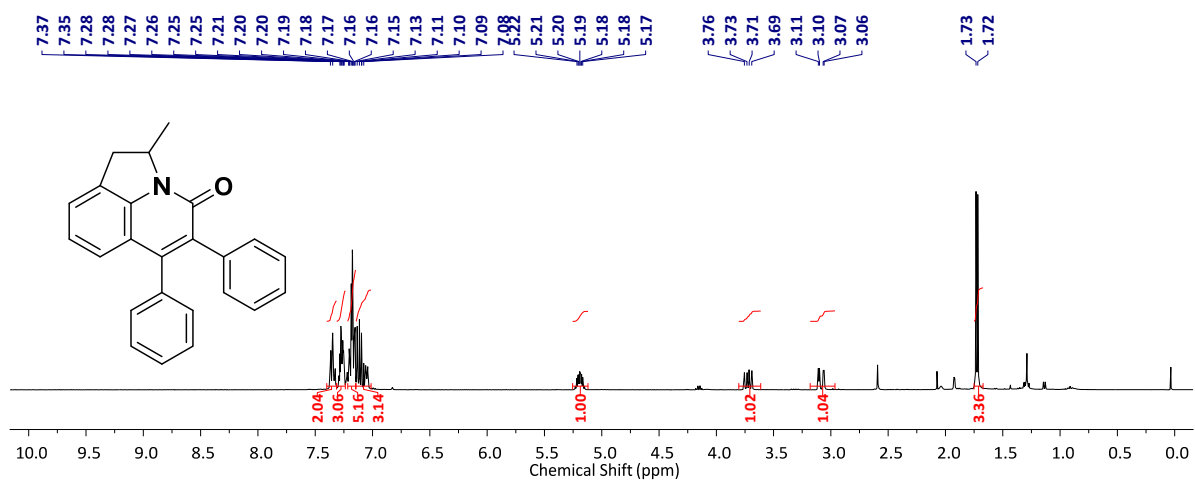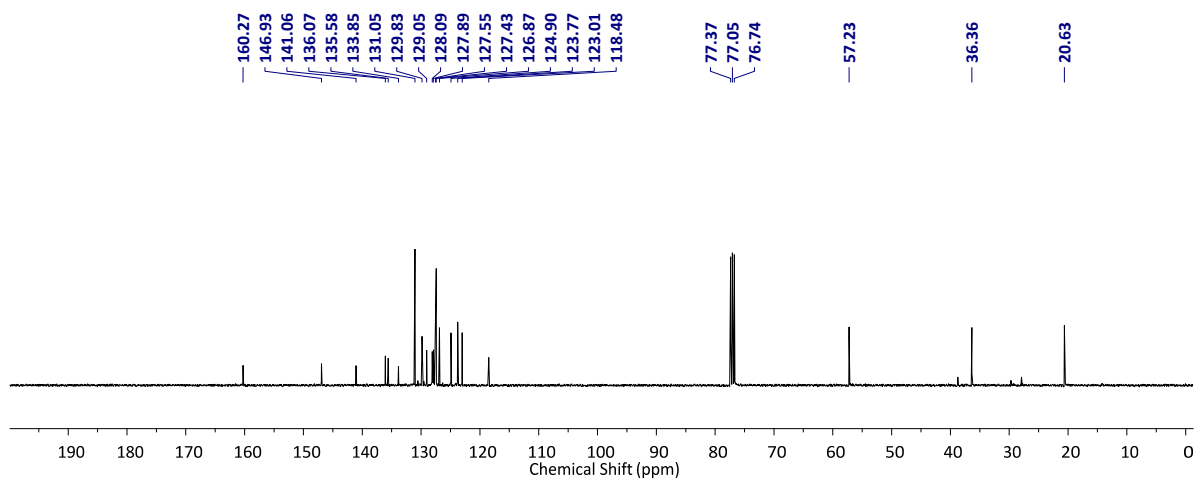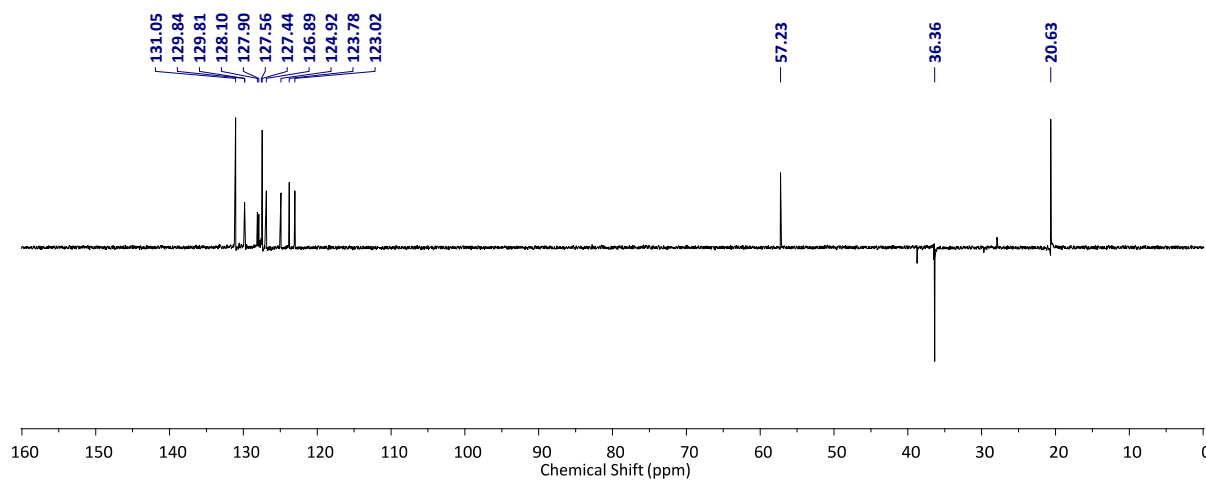

# $^1\text{H}$ and $^{13}\text{C}$ NMR Spectra of Compound 3da.

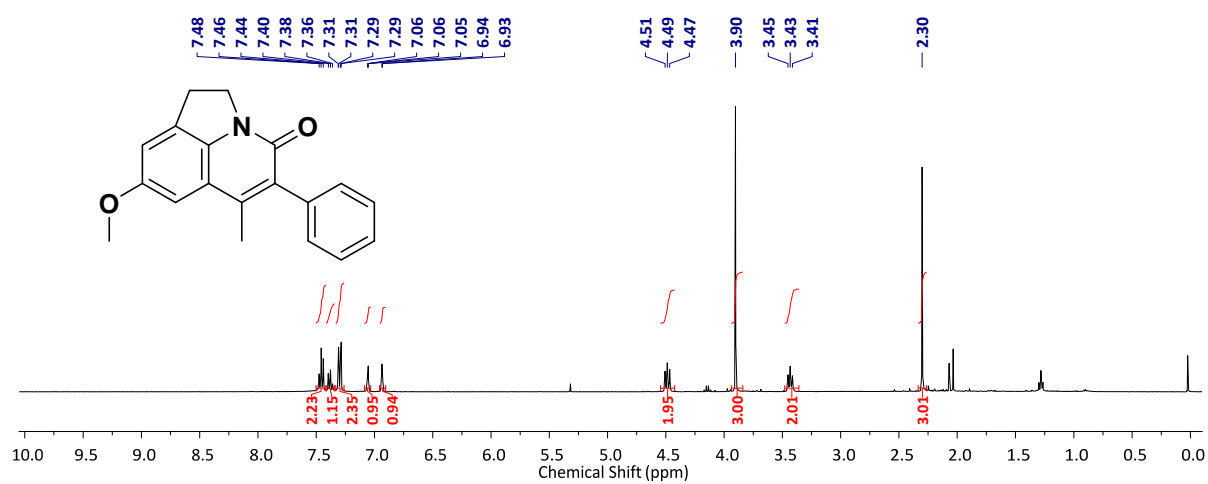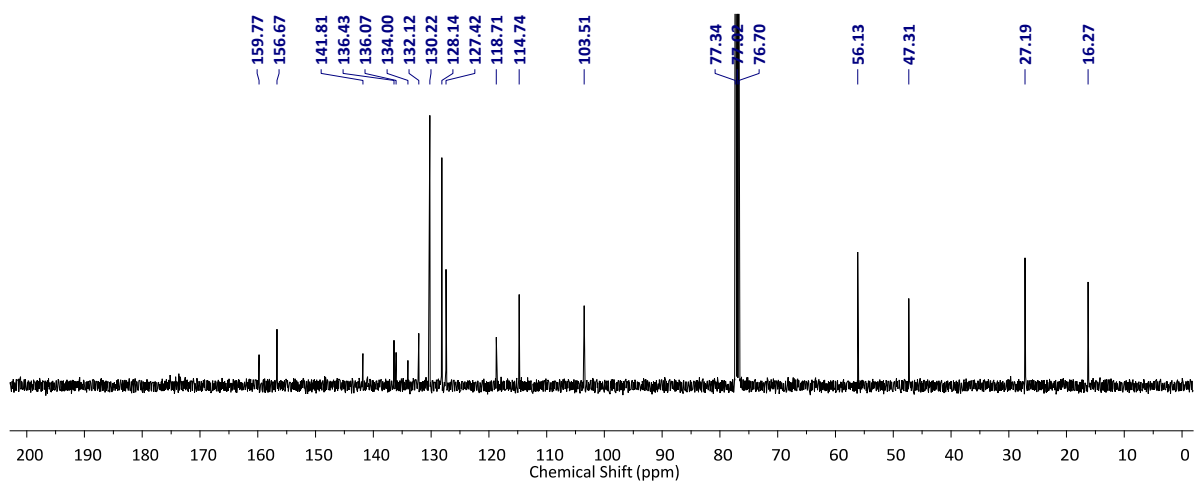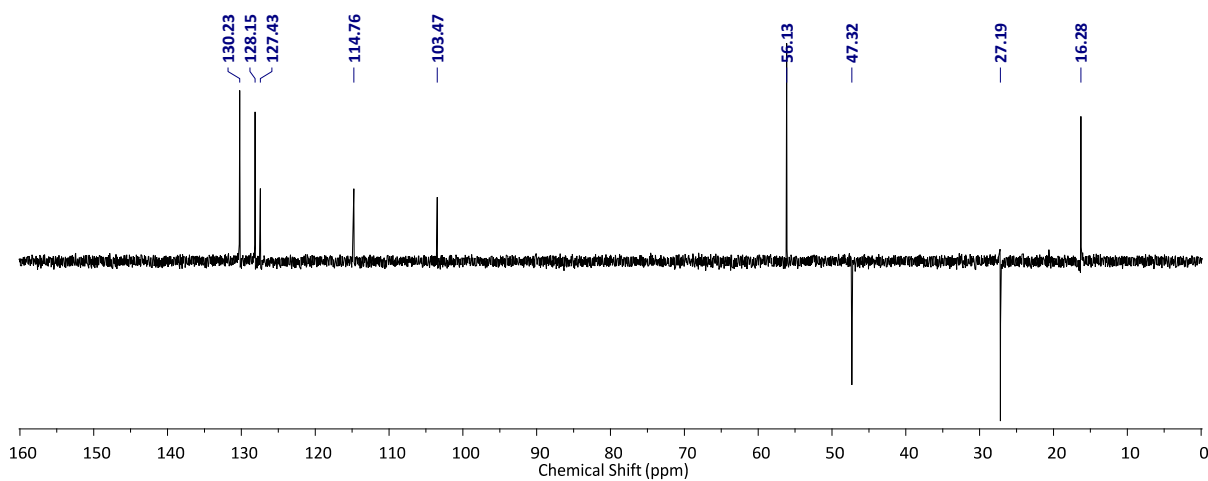

# <sup>1</sup>H and <sup>13</sup>C NMR Spectra of Compound 3ea.

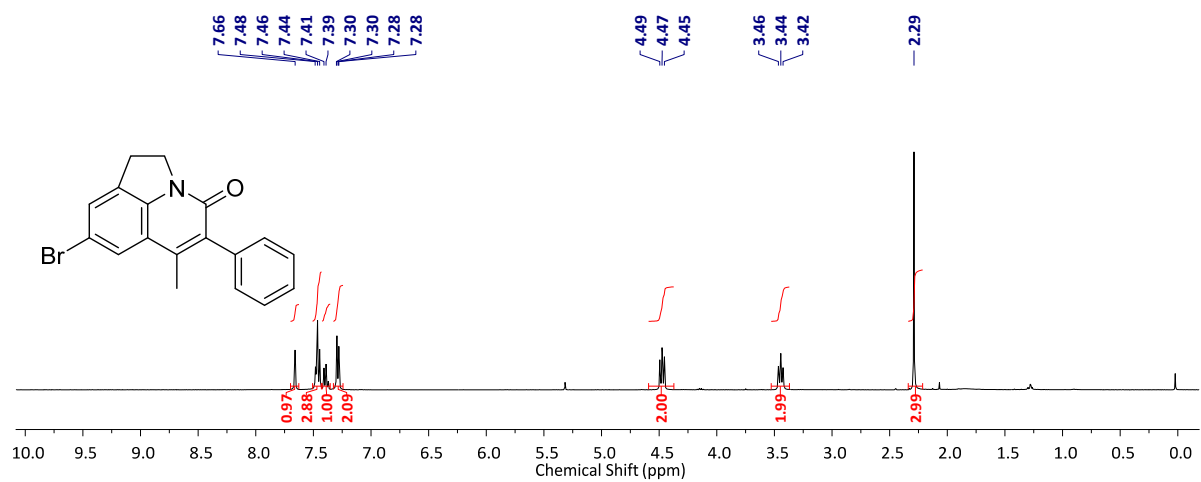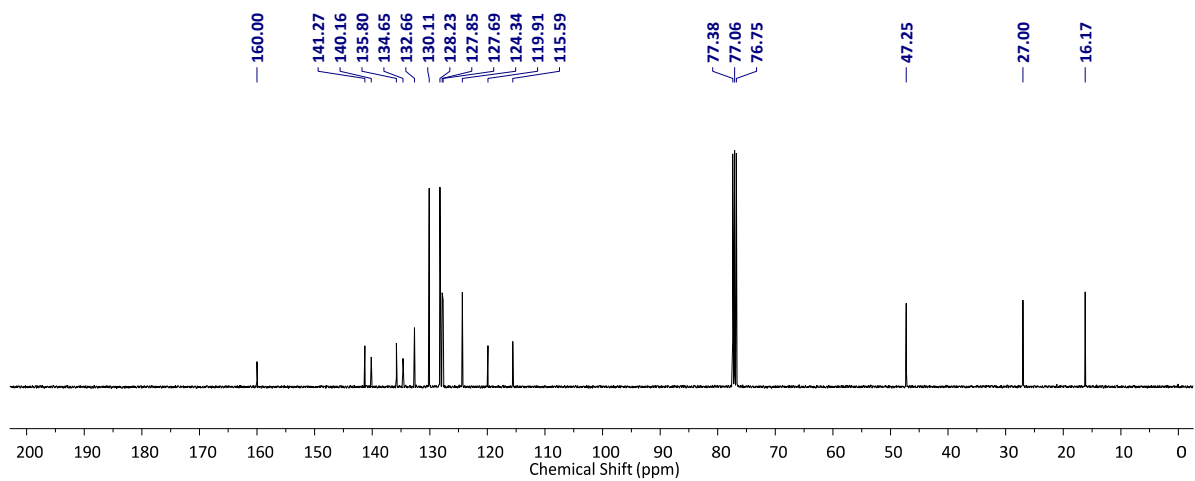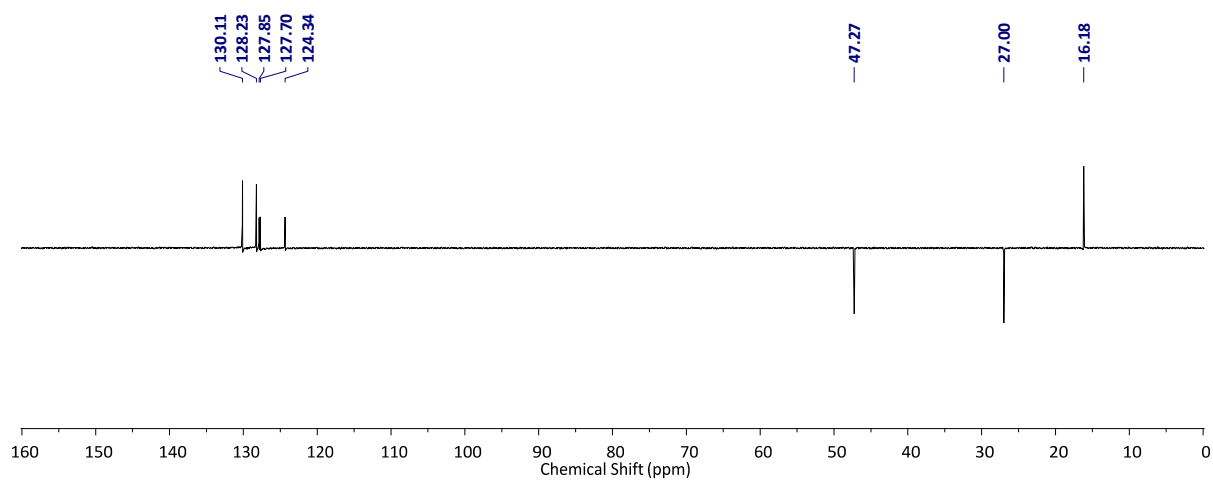

# $^1\text{H}$ and $^{13}\text{C}$ NMR Spectra of Compound 3eh.

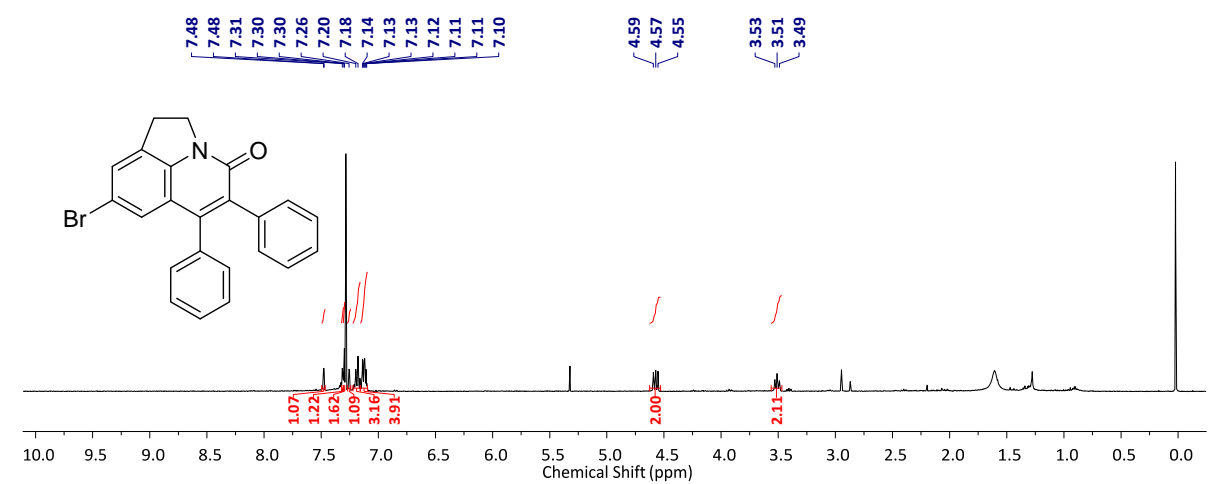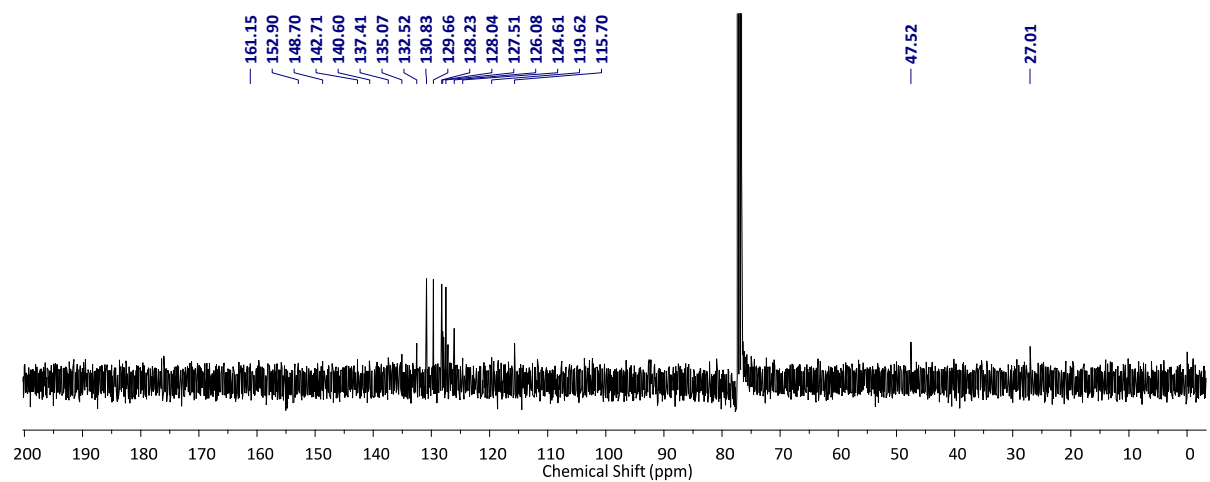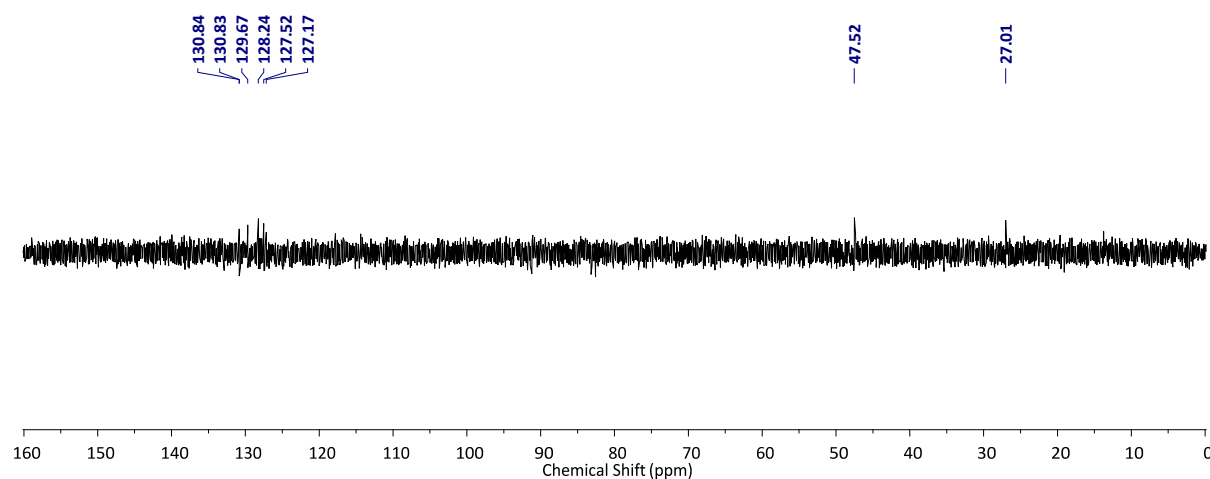

# <sup>1</sup>H and <sup>13</sup>C NMR Spectra of Compound 3fa.

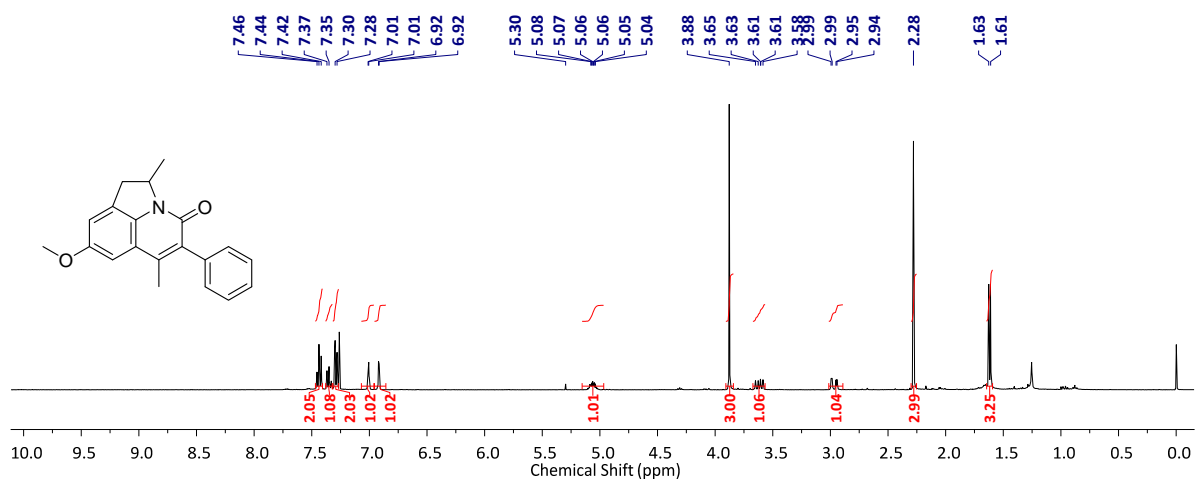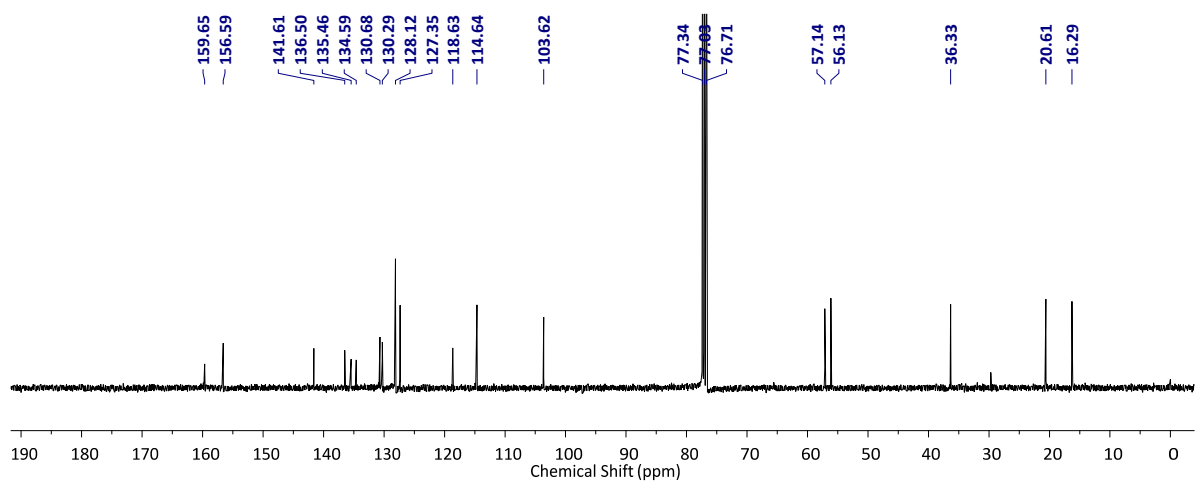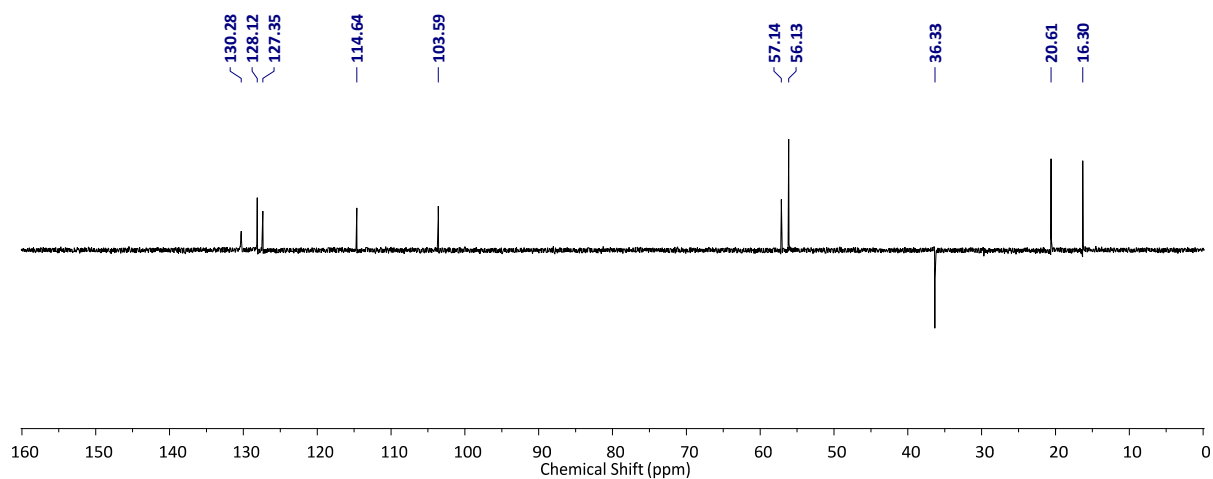

# <sup>1</sup>H and <sup>13</sup>C NMR Spectra of Compound 3ga.

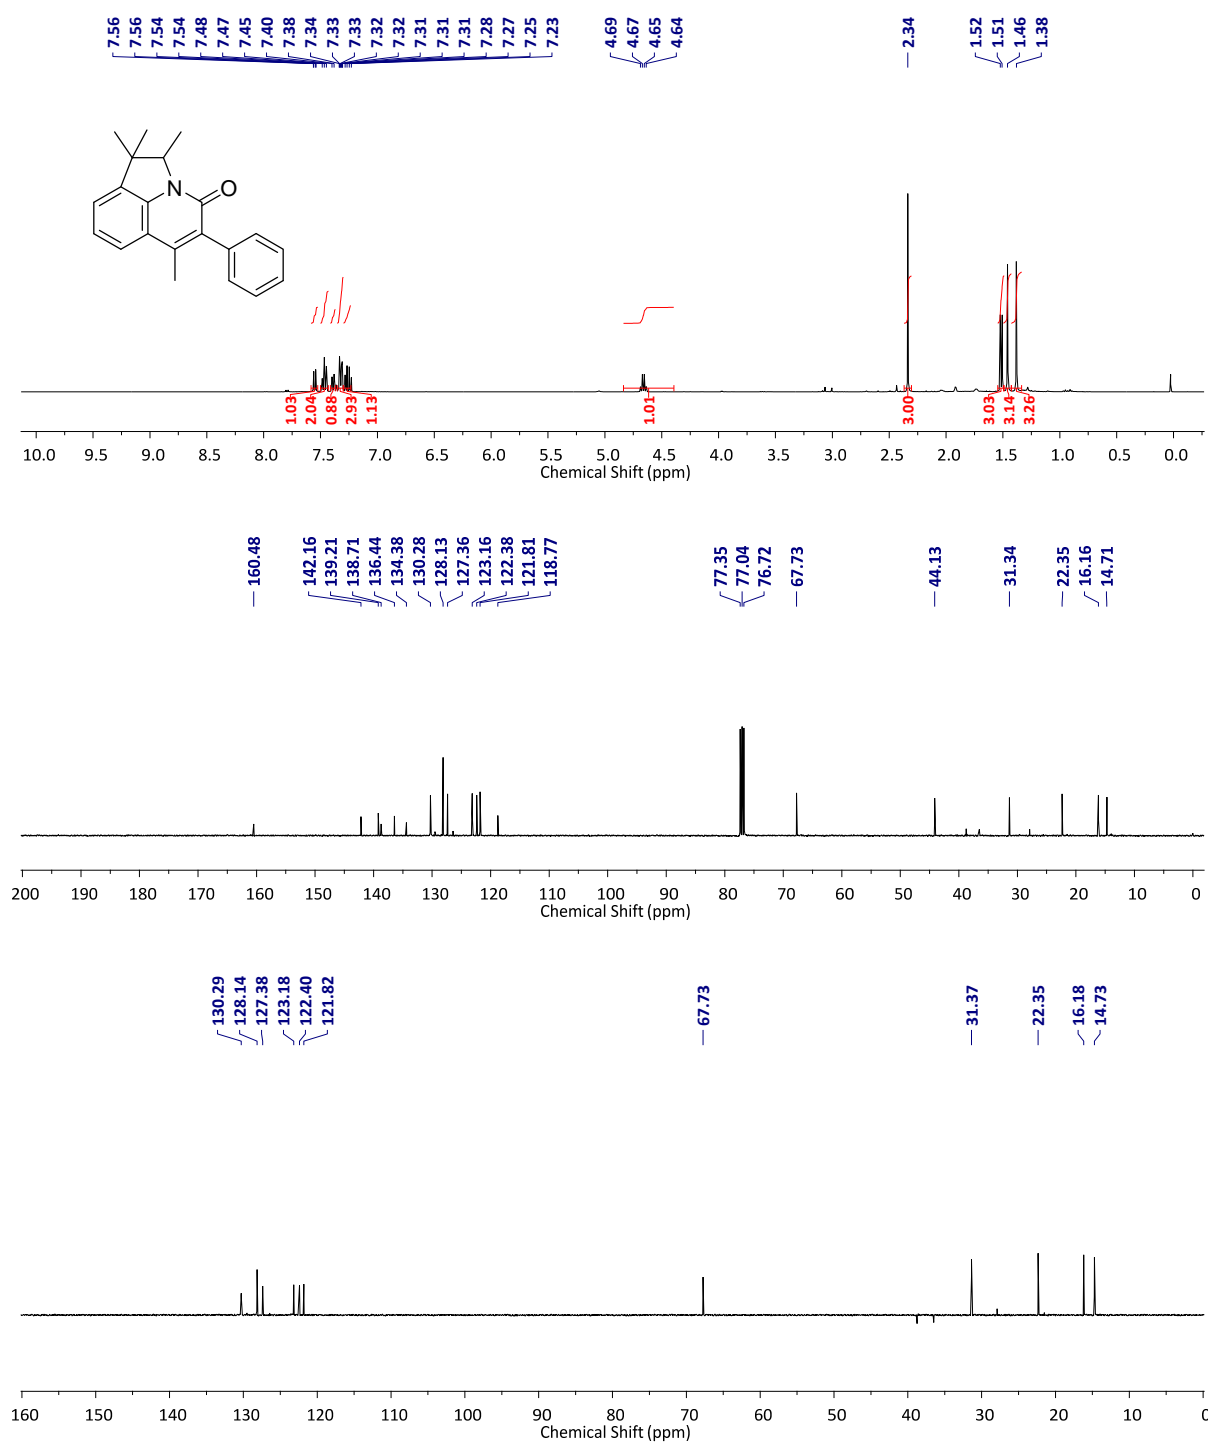

# $^1\text{H}$ and $^{13}\text{C}$ NMR Spectra of Compound 3ha.

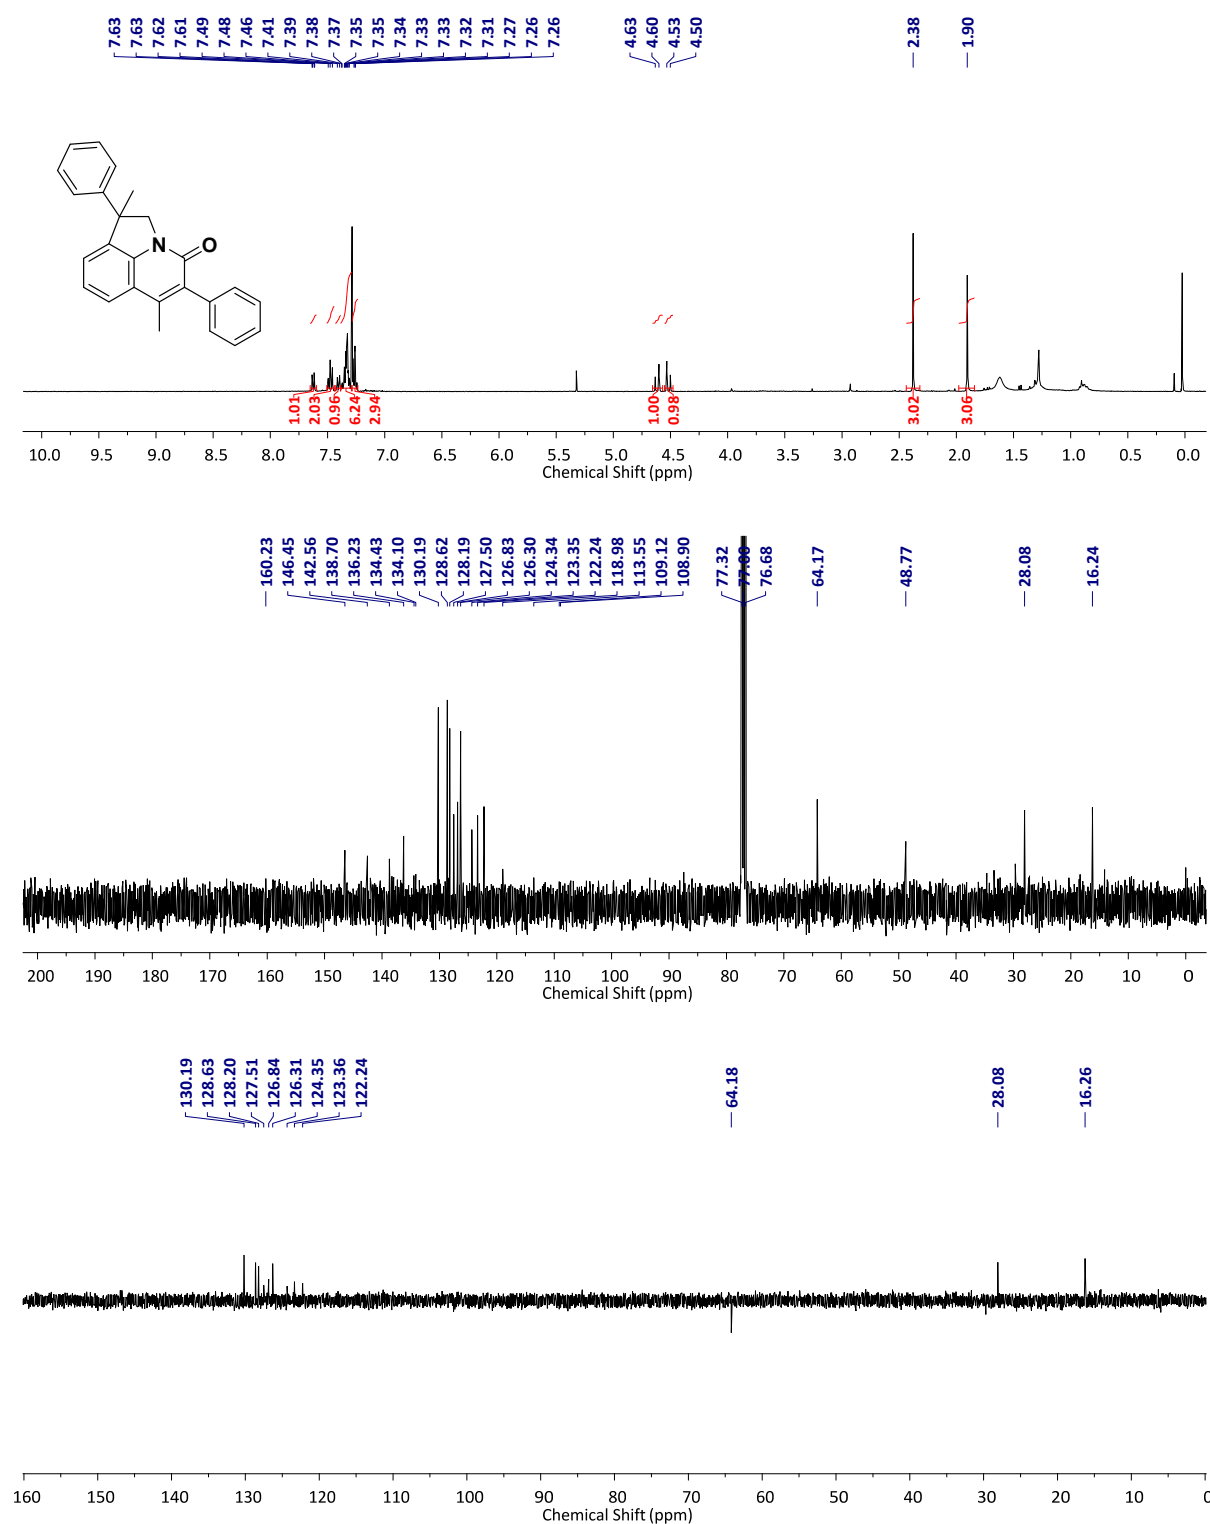

# <sup>1</sup>H and <sup>13</sup>C NMR Spectra of Compound 3ia.

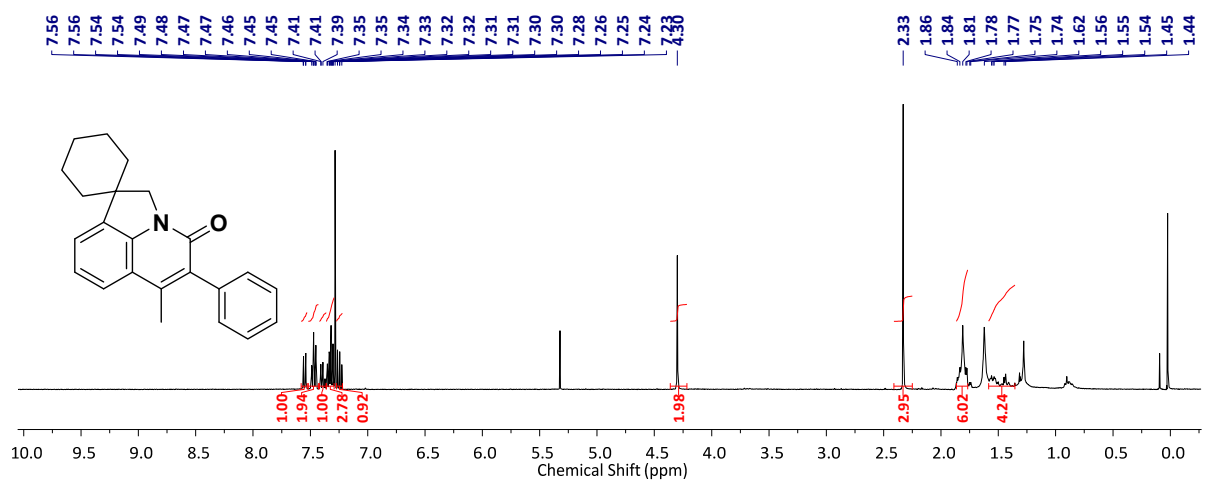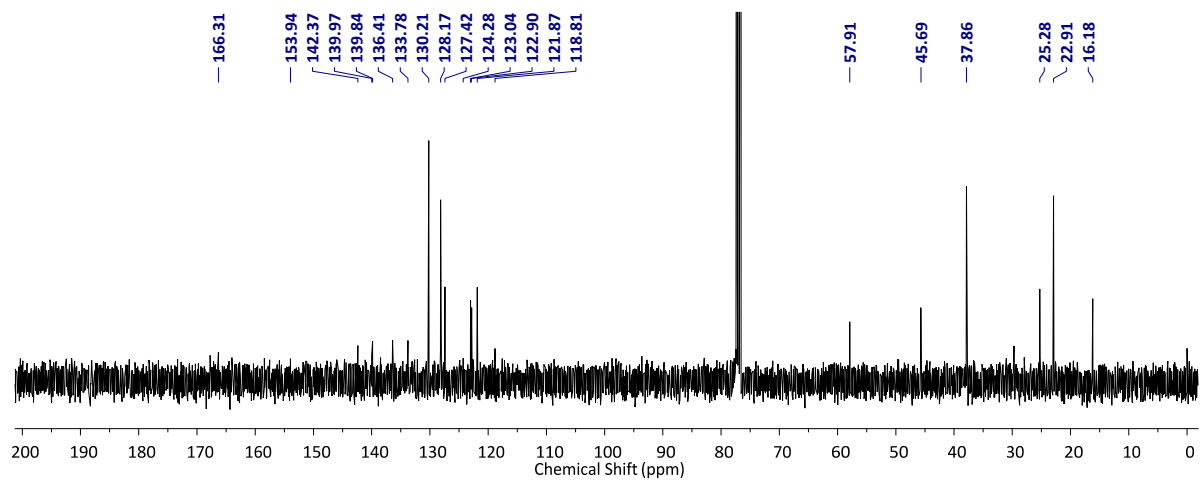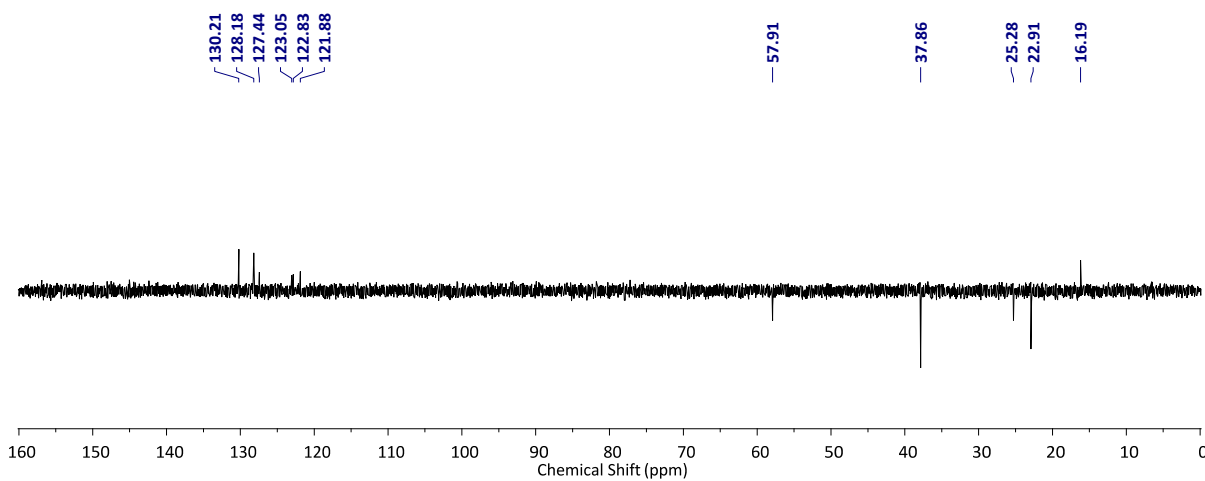



# <sup>1</sup>H and <sup>13</sup>C NMR Spectra of Compound 4a.

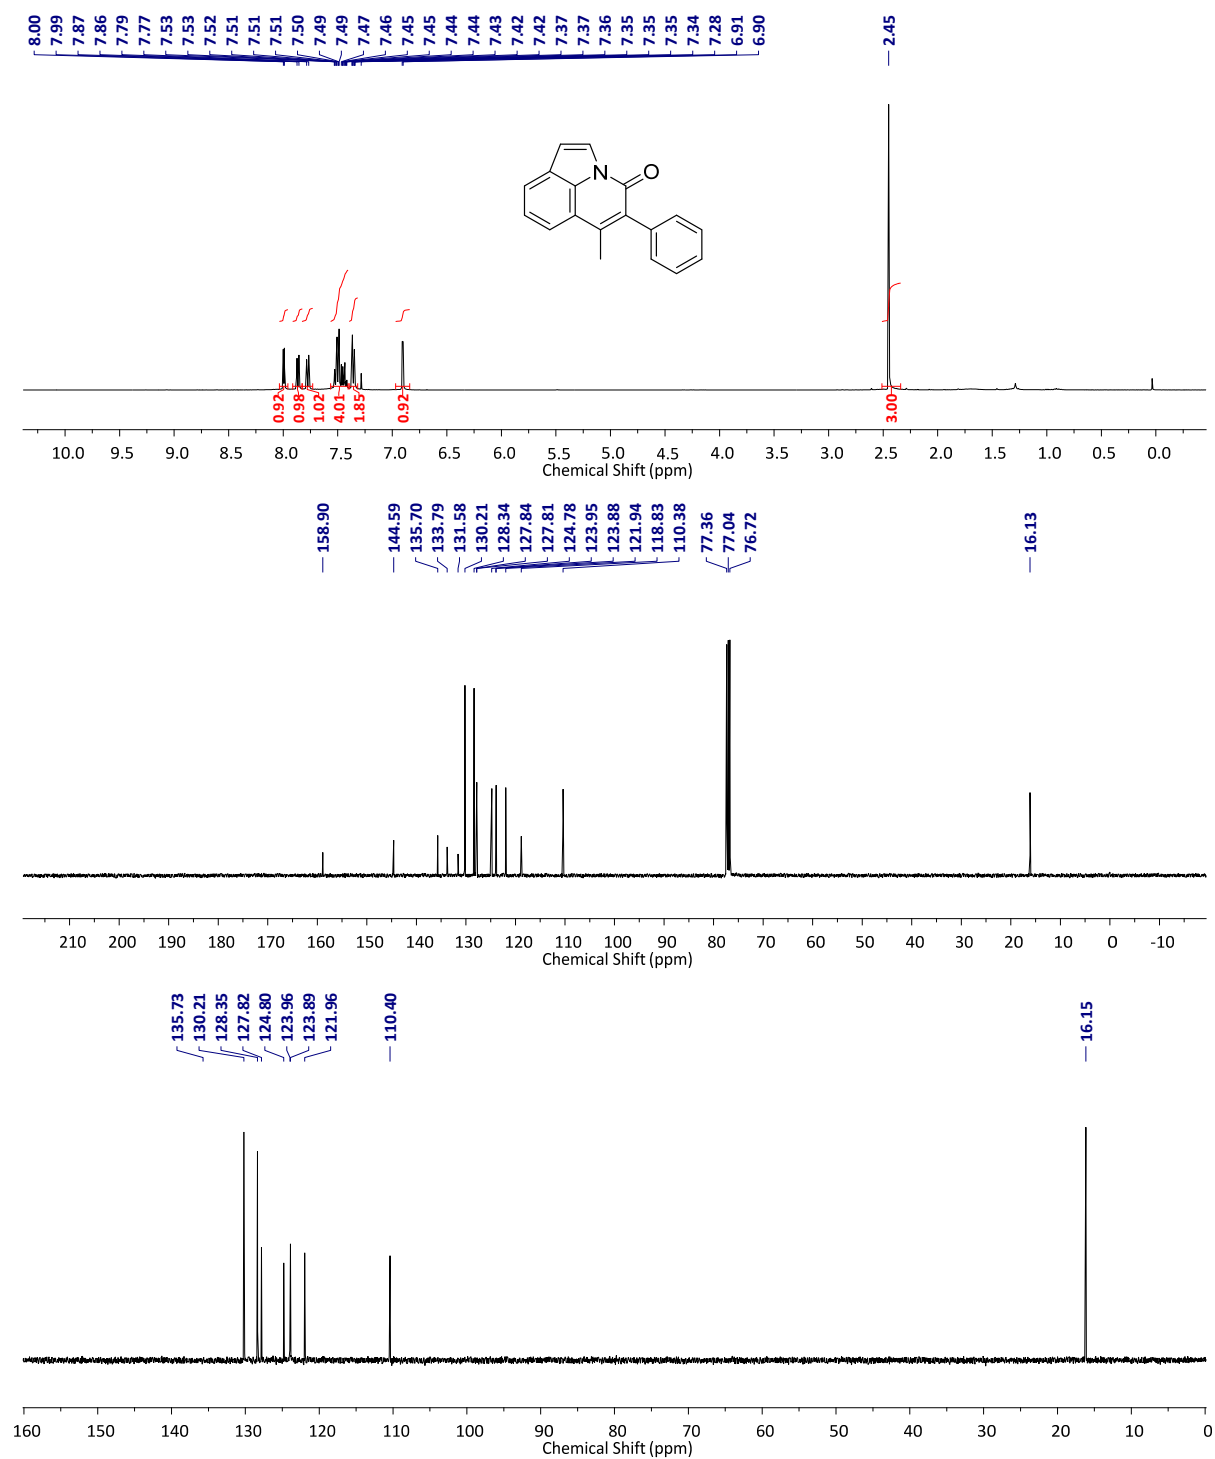

# $^1\text{H}$ and $^{13}\text{C}$ NMR Spectra of Compound 4b.

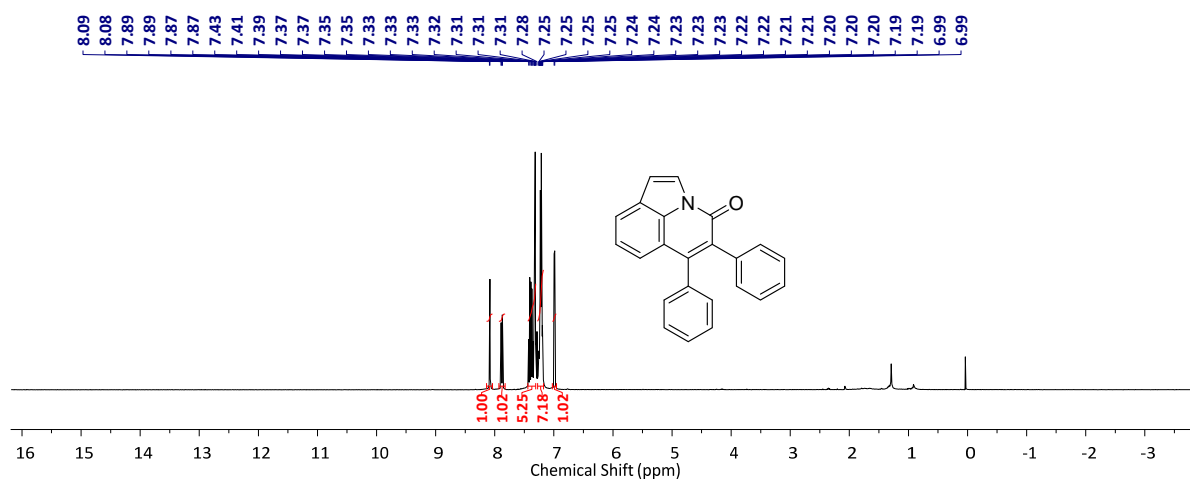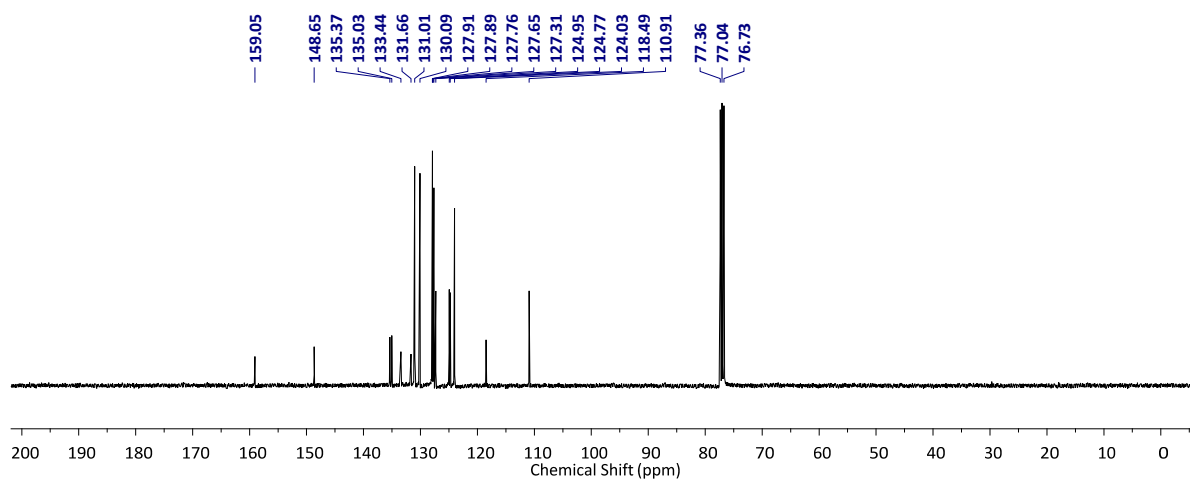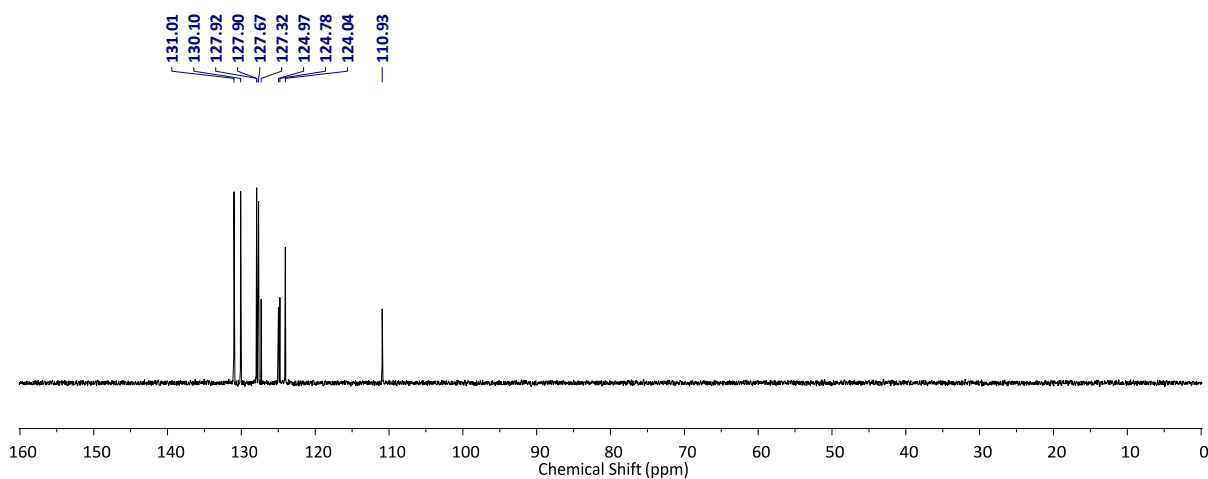

Supplement: c5ob01146a1.pdf [file c5ob01146a1.pdf]
